# Supplementary material
Source: PubMed Central journal article supplement (PMC8713775)
Supplement: pnas.2112560118.sapp.pdf [file pnas.2112560118.sapp.pdf]

## Supporting Information Appendix

### High impact rare genetic variants in severe schizophrenia

**Authors:** Anthony W. Zoghbi, MD<sup>1,2,3,4,5\*</sup>, Ryan S. Dhindsa, PhD<sup>2,4,6,7</sup>, Terry E. Goldberg, PhD<sup>3,5,8</sup>, Aydan Mehralizade, MPH<sup>3,5</sup>, Joshua E. Motelow, MD, PhD<sup>4,7,9</sup>, Xinchun Wang, PhD<sup>4,7,10</sup>, Anna Alkelai, PhD<sup>4,7</sup>, Matthew B. Harms, MD<sup>4,11,12</sup>, Jeffrey A. Lieberman, MD<sup>3,5</sup>, Sander Markx, MD<sup>3,5†</sup>, David B. Goldstein, PhD<sup>4,7\*†</sup>

#### Affiliations:

<sup>1</sup>Menninger Department of Psychiatry and Behavioral Sciences, Baylor College of Medicine, Houston, Texas, USA.

<sup>2</sup>Department of Molecular and Human Genetics, Baylor College of Medicine, Houston, Texas, USA.

<sup>3</sup>Department of Psychiatry, Columbia University Irving Medical Center, New York, New York; New York State Psychiatric Institute, New York, NY, USA.

<sup>4</sup>Institute of Genomic Medicine, Columbia University Irving Medical Center, New York, NY, USA.

<sup>5</sup>New York State Psychiatric Institute, Office of Mental Health, New York, NY, USA.

<sup>6</sup>Jan and Dan Duncan Neurological Research Institute, Houston, TX, USA.

<sup>7</sup>Department of Genetics and Development, Columbia University Irving Medical Center, New York, NY, USA.

<sup>8</sup>Department of Anesthesiology, Columbia University Irving Medical Center, New York, NY, USA.

<sup>9</sup>Department of Pediatrics, Division of Critical Care and Hospital Medicine, Columbia University Irving Medical Center, New York-Presbyterian Morgan Stanley Children's Hospital of New York, New York, NY, USA.

<sup>10</sup>Waypoint Bio, 180 Varick St, 6th Floor, New York, NY, USA.

<sup>11</sup>Department of Neurology, Columbia University Irving Medical Center, New York, NY, USA.

<sup>12</sup>Center for Motor Neuron Biology and Disease, Columbia University Irving Medical Center, New York, NY, USA.

## Methods

**Fig. S1.** UMAP and cluster assignment of SETRS and controls

**Fig. S2.** UMAP and cluster assignment of typical schizophrenia and controls

**Fig. S3.** Burden of rare variants in tolerant genes

**Fig. S4.** SETRS gene-based rare variant collapsing analysis Q-Q plots

**Fig. S5.** UMAP and cluster assignment of SETRS and controls for genome-only analysis

**Fig. S6.** UMAP and cluster assignment of typical schizophrenia and controls for genome-only analysis

**Fig. S7.** Burden of rare variants in intolerant genes for genome-only analysis

**Fig. S8.** Burden of rare variants in tolerant genes for genome-only analysis

**Fig. S9.** SETRS gene-based rare variant collapsing analysis Q-Q plots for genome-only analysis

**Fig. S10.** Synonymous Q-Q plot for typical schizophrenia vs. controls

**Fig. S11.** Burden of rare variants in SETRS compared to typical schizophrenia and control individuals for genome-only analysis

**Fig. S12.** Synonymous Q-Q plot for typical schizophrenia vs. controls for genome-only analysis

**Table S1.** Control and typical schizophrenia phenotypes and sequencing type

**Table S2.** Case and control cohort ancestries

**Table S3.** Control phenotypes for genome-only analysis

**Table S4.** Case and control cohort ancestries for genome-only analysis

**Table S5.** Qualifying loss-of-function variants in Online Mendelian Inheritance in Man (OMIM) genes

**Table S6.** Qualifying missense variants in Online Mendelian Inheritance in Man (OMIM) genes

**Table S7.** Qualifying missense and loss-of-function variants with reported genotype-phenotype associations

**Table S8.** Top ten genes from gene-based collapsing models

**Table S9.** Qualifying Missense and Loss-of-Function Variants in Intolerant Genes

## References

## **Methods**

### **Severe, extremely treatment-resistant schizophrenia (SETRS) participant inclusion criteria**

1. Provision of informed consent or assent with informed consent from a legally authorized representative.
2. Structured Clinical Interview for DSM-5 (SCID-5) diagnosis of schizophrenia.
3. Continuous residence in a New York State Office of Mental Health inpatient facility for  $\geq 5$  years.
4. Treatment resistance as defined by continued psychotic symptoms despite adequate trials of two or more antipsychotic medications for  $\geq 6$  weeks(48).

### **SETRS participant exclusion criteria**

1. Patients hospitalized under Criminal Procedure Law (i.e. Not Guilty by Reason of Insanity).
2. Medical or neurologic disorder (e.g. stroke, traumatic brain injury) that predates schizophrenia onset and better explains symptomatology.
3. Greater than five-year length of stay primarily due to discharge refusal or high risk of violence, suicide, or sexual offense.

### **Diagnostic methods and phenotypic assessment**

For SETRS participants, a psychiatrist (A.Z.) diagnosed schizophrenia using the psychosis module from the Structural Clinical Interview for DSM-5 based on a combination of interviews with the participant, collateral informants (primary clinical team and involved family members), and lifetime medical record review by a psychiatrist (A.Z.) and study coordinator (A.M.). Consensus diagnoses with a second psychiatrist (S.M.) was made for each participant.

We define severe, extremely treatment-resistant schizophrenia (SETRS) individuals as those whose severity of schizophrenia has required continuous hospitalization for at least 5 years. This 5-year cut off is based on prior research on “Kraepelinian” or “Very Poor Outcome” schizophrenia, which differs from typical schizophrenia in that it is characterized by worse

cognitive impairment, treatment resistance, stronger family history of schizophrenia spectrum disorders, and imaging abnormalities(56, 57). We elected not to assess for the presence of schizoaffective disorder (SAD) given the substantial genetic overlap between schizophrenia and schizoaffective disorder(58), low interrater reliability of SAD(59), and difficulty obtaining an accurate retrospective mood and neurovegetative symptom history from severely affected individuals. We calculated total duration of hospitalization in New York State Office of Mental Health state inpatient facilities using the New York State Facilities Enterprise Reporting system. We estimated age of onset of psychosis based on a combination of participant interview, collateral from family and clinical team, first documented hospitalization, and detailed medical record review.

For the typical schizophrenia analysis, we only selected individuals with a diagnosis of schizophrenia from the Genomic Psychiatry Cohort. Diagnostic and phenotyping methods for this cohort have been described in detail elsewhere(53). Thirty samples were ascertained as part of an exome sequencing study of schizophrenia and schizoaffective disorder that has been previously described in detail(54). For individuals ascertained as part of the whole-genome sequencing in psychiatric genetics at Massachusetts General and McLean Hospitals in Boston, the diagnostic process differed slightly for single proband samples versus samples recruited as part of a trio. For single probands, the clinical assessment was based on a review of all hospital records by two independent senior clinicians, which was then used to provide a consensus diagnosis of schizophrenia or schizoaffective disorder based on DSM-5 criteria. For participants enrolled as part of a trio, probands were assessed based on a SCID interview and a review of all hospital records (where applicable). Then, a consensus Axis I DSM-IV diagnoses of schizophrenia or schizoaffective disorder was assigned by a group of four senior clinicians based

on a review of all material. Of note, each of the typical schizophrenia cohorts include some individuals who are treatment resistant. However, given that 30% of all individuals with schizophrenia experience treatment resistance(48), this is not inconsistent with a typically ascertained cohort.

### **Whole genome/exome sequencing and variant calling**

Samples of blood-extracted SETRS individuals and whole genome controls were sequenced according to standard protocols on Illumina's NovaSeq 6000 (Illumina, San Diego, CA, USA) platform with 150 base pair paired-end reads at Columbia's Institute for Genomic Medicine (IGM) and New York Genome Center (NYGC). Typical schizophrenia individuals' whole genome samples were sequenced on a combination of NovaSeq 6000 or HiSeq2500 at the IGM or the HiSeq X at the NYGC. Whole genome typical schizophrenia samples from dbGaP were sequenced at the Broad Institute on Illumina HiSeq2500. Exome samples were sequenced with IDT Exome Research Panel Version 1, Roche NimbleGen EZCap Version 3, Illumina TruSeq 65MB, or Agilent SureSelect Human All Exon V5 capture kits using Illumina GAIIX, HiSeq 2000, or HiSeq 2500 sequencers following standard protocols.

We aligned reads to human reference GRCh37 using DRAGEN (Edico Genome, San Diego, CA, USA)(61) and duplicates were marked and removed using Picard tools (Broad Institute, Boston, MA, USA). Variants were called as per the Genome Analysis Toolkit (GATK - Broad Institute, Boston, MA, USA) Best Practices recommendations v3.6(62). Variant type/function were annotated with ClinEff(63) and the IGM's in-house Analysis Tool for Annotated Variants(64) was used to add custom annotations including gnomAD v2.1 frequencies, regional-intolerance metrics, and clinical annotations provided by the Human Gene

Mutation Database (HGMD)(65), ClinVar(66), and Online Mendelian Inheritance in Man (OMIM)(29).

### **Sample and variant quality control and filtering**

The initial samples included 116 SETRS individuals, 230 typical schizophrenia individuals, and 5,950 controls for the combined whole exome and genome analysis. For the genome-only analysis, we included 116 SETRS individuals, 200 typical schizophrenia, and 4,817 controls. We removed samples with a discordance between sequence-derived X:Y coverage ratio and their self-reported gender and >5% contamination according to VerifyBamID(67). Case and control cohorts were screened for cryptic relatedness with KING to remove related individuals (second-degree relatives or closer in relatedness) electing to retain cases over controls in each pair. Samples were also removed if they had less than 90% 10-fold coverage of the consensus coding sequence (CCDS) regions (release 20). SETRS (97.6%), typical schizophrenia (97.2%), and whole exome/genome controls (95.6%) genome-only controls (97.5%) were similar in the percentage of CCDS bases with 10-fold coverage. Control samples were also removed if they were included in the gnomAD database or were sequenced using a capture kit with insufficient coverage of the exome. The final SETRS cohort included 112 SETRS individuals, 218 typical schizophrenia individuals, and 4,929 controls. The final genome-only cohort included 114 SETRS individuals, 198 typical schizophrenia individuals, and 4,146 controls.

Variant calls were required to have at least 10-fold coverage, quality-by-depth score (QD)  $\geq 5$ , quality score (QUAL)  $\geq 50$ , mapping quality score (MQ)  $\geq 40$ , genotype quality score (GQ)  $\geq 20$ , read position rank sum (RPRS)  $\geq -3$ , mapping quality rank sum (MQRS)  $\geq -10$ . Single nucleotide variants (SNVs) were required to have Fisher's strand bias (FS) of  $< 60$  and

Strand Odds Ratio (SOR) < 3. Indels were required to have FS < 200 and SOR < 10. Variants were removed if they did not pass GATK's standard variant quality score recalibration (VQSR) threshold. We also removed known sequencing artifacts as described in Petrovski et al. 2017(51) and variants previously identified as problematic by ExAC(69), gnomAD(21), or EVS (<http://evs.gs.washington.edu/EVS/HelpDescriptions.jsp>). For heterozygous genotypes, the alternative allele ratio (allelic balance) was required to be  $\geq 30\%$ . We restricted the analyses to variants within the CCDS or the 2 base pair canonical splice sites.

To remove confounding due to differential coverage between cases and controls, we used site-coverage harmonization as previously described(51). Briefly, we removed any bases that had a greater than 7% absolute difference in 10-fold coverage between cases and controls as coverage differences between cases and controls could potentially introduce bias. This coverage harmonization technique reduces potential bias that can stem from differences in sequencing depth, coverage between sequencers, and differential coverage between whole genome sequencing and whole exome sequencing capture kits.

We externally filtered for variants with a minor allele frequency (MAF)  $\leq 1 \times 10^{-4}$  in each represented ancestral population in the non-psychiatric ("non-neuro") subset of gnomAD. We then filtered using internal minor allele frequency of 0.0005 to control for site and sequencer-specific artifacts as previously described(52). We only included SNVs and indels receiving "PASS" for the gnomAD random forest filter. We then removed variants falling under the recommended cutoffs for the gnomAD random forest true probability for SNVs: 0.1 (exome)/0.4 (genome) and indels: 0.2 (exome)/0.4 (genome). We removed loss-of-function variants flagged as low confidence by LOFTEE and those falling in low complexity, segmental duplication, and decoy regions as defined by gnomAD(21). We filtered out loss-of-function variants expressed in

less than 10% of transcripts using the proportion expressed across transcripts (PEXT) score(70) with the recommended cutoff of 0.1. To normalize PEXT values across a gene, we divided each base pair's PEXT score by the maximum PEXT value for that gene to create a PEXT ratio. This procedure accounts for the spuriously low PEXT values across certain genes in gnomAD (e.g. *CNTNAP2*). Qualifying loss-of-function variants included rare variants that passed the above quality control metrics and were annotated by ClinEff as stop gain, canonical splice donor/acceptor, or frameshift variants.

Missense variants were filtered for pathogenicity/deleteriousness using the rare exome variant ensemble learner (REVEL) tool(23). We used the recommended cutoff of  $> 0.5$  to classify variants as “damaging.” We selected a cutoff of  $< 0.15$  to classify variants as “benign,” corresponding to a false-positive rate of 5%. We further filtered missense variants using the missense tolerance ratio (MTR) tool(25). MTR identifies regional intolerance to missense variation, thereby highlighting functionally important genic sub-regions. We used the most conservative estimate of regional intolerance, MTR FDR, with the authors' recommended cutoff of  $\text{MTR FDR} < 0.1$ (25). Qualifying missense variants for gene set burden analyses were rare variants that passed the above quality control metrics with  $\text{REVEL} > 0.5$  and  $\text{MTR FDR} < 0.1$ .

### **Gene set curation**

To create the missense and loss-of-function intolerant gene sets, we used the recommended cutoffs of  $\text{pLI} > 0.9$  and missense Z score  $> 3.09$  based on constraint metrics from gnomAD v2.1 ([https://storage.googleapis.com/gnomad-public/release/2.1.1/constraint/gnomad.v2.1.1.lof\\_metrics.by\\_gene.txt.bgz](https://storage.googleapis.com/gnomad-public/release/2.1.1/constraint/gnomad.v2.1.1.lof_metrics.by_gene.txt.bgz)). Our missense and



loss-of-function tolerant gene sets included genes with missense  $Z < 1$  and  $pLI < 0.001$ , respectively.

We created our OMIM gene set based on OMIM data downloaded on November 21<sup>st</sup>, 2019. We began with a list of all protein-coding OMIM genes (4,231 genes) and removed any gene with an “equivocal,” “non-disease,” or “susceptibility” tag, which resulted in an established disease gene set of 3,509 genes. Of these 3,509 genes, 3,114 have a detailed clinical synopsis with phenotypic annotations across organ systems in OMIM. To create our OMIM “behavioral” gene set, we took the subset of established disease genes that had the requisite annotation in OMIM: “neurologicBehavioralPsychiatricManifestations.” We reviewed all phenotypic annotations in this list and removed any non-behavioral annotations including "ALDH2\*2 carriers suffer more severe hangovers | Increased intoxicating symptoms after alcohol consumption", and "No behavior problems." This filtering produced a list of 498 behaviorally-annotated OMIM genes. The remaining 2616 phenotypically annotated genes in OMIM were used to create our “Non-Behavioral OMIM” gene set.

As most of the rare variant burden in schizophrenia and our sample lies in intolerant genes, we restricted our OMIM and behavioral OMIM analyses to our previously described intolerant gene sets of  $pLI > 0.9$  and missense  $Z$  score  $> 3.09$ . This resulted in final gene sets of OMIM loss-of-function intolerant: 805 genes, OMIM Missense Intolerant: 350 genes, OMIM Behavioral loss-of-function Intolerant: 226 genes, Non-Behavioral OMIM loss-of-function intolerant: 511 genes, OMIM Behavioral Missense Intolerant: 127 genes, Non-Behavioral OMIM missense intolerant: 201 genes.

To create the autism spectrum disorder and developmental delay gene set, we combined the most recently published genome-wide significant autism spectrum disorder ( $n=102$ ) and

developmental delay (n=299) genes for a total of 340 unique genes in the gene set(6, 7). We tested for a case-control burden of qualifying missense and loss-of-function variants in this combined gene set. To create the gene set of genes previously implicated in typical schizophrenia, we used data from (accessed October 7<sup>th</sup>, 2019) the Schizophrenia Exome Meta-Analysis Consortium (SCHEMA) browser (<https://schema.broadinstitute.org/>) (accessed October 7<sup>th</sup>, 2019), which published specific  $p$  values for missense and loss-of-function enrichment in nearly 25,000 typical schizophrenia cases and 100,000 controls. We used these variant specific  $p$  values from SCHEMA rather than the meta-analysis  $p$  values (which combine counts of missense and loss-of-function variants) because of importance matching variant type with the genetic mechanism (e.g. analyzing missense variants in missense-driven gene). As there are only 10 genome-wide significant genes in schizophrenia, we elected to use  $p$  values of nominal significance for missense-driven ( $p < 0.05$ , n=144) and loss-of-function-driven ( $p < 0.01$ , n=198) SCHEMA genes to create roughly equivalently sized gene sets. We also filtered this list by removing any genes that reached nominal significance due to enrichment in controls as opposed to cases. As previously described, we further restricted these two gene sets to their respective intolerant subset with pLI > 0.9 for loss-of-function-driven SCHEMA genes (n=94) and missense  $Z > 3.09$  for missense-driven SCHEMA genes (n=45).

### **Quantile-quantile plots and Genomic Inflation Factor ( $\lambda$ )**

Quantile-quantile (QQ) plots were generated using a previously described method (19, 51). Observed  $p$  values were generated for each gene for each model using the Cochran-Mantel-Haenszel test as described above (see Gene-based rare variant collapsing analysis). Expected  $p$  values and 95% confidence intervals were generated in the following manner. Briefly, for each

collapsing model within each cluster, case and control labels were randomly permuted while keeping the qualifying variant gene-by-sample matrix fixed. We then used the CMH test to compare the new case and controls with and without qualifying variants in each gene to test for an association for case vs. control status. We repeated this process 1,000 times and used the mean rank-ordered  $p$  values as empirical estimates of the expected  $p$  values. We then generated QQ plots using the negative logarithm of the permutation-based expected vs. observed distribution of the  $p$  values. The genomic inflation factor ( $\lambda$ ) was estimated from the permutation-based expected  $p$  values using a regression method previously described (19, 51).

### **Clinical diagnostic analysis**

For our diagnostic analysis, we analyzed single nucleotide and insertion/deletion variants within the CCDS and 2 base pair splice sites in SETRS individuals only. Variant quality control was as described above with several exceptions. We allowed a lower allelic balance (25%) and did not perform site coverage harmonization as it is irrelevant for diagnostic analysis. Variants were filtered for frequency with allele counts of less than five in gnomAD. We also analyzed all variants annotated as potentially damaging as defined by ClinEff as opposed to only missense and loss-of-function variants.

We then prioritized variants that have previously been reported as pathogenic/likely pathogenic or affect the same amino acid as a pathogenic variant. Our pipeline incorporates curated data from ClinVar(66), Human Gene Mutation Database (HGMD), and internal IGM cases to annotate all variants previously reported as pathogenic. We also prioritize loss-of-function variants (stop gain/lost, start lost, splice site acceptor/donors, frameshift indels) in genes with known pathogenic loss-of-function variants or reported as haploinsufficient in ClinGen(71).

We also individually reviewed all qualifying missense and loss-of-function variants in OMIM disease genes (Table S5 and S6). We then evaluated each candidate variant using ACMG guidelines(30) with respect to their schizophrenia diagnosis only. As such, we did not report pathogenic variants for unrelated conditions (e.g. carrier for Cystic Fibrosis) for this manuscript.

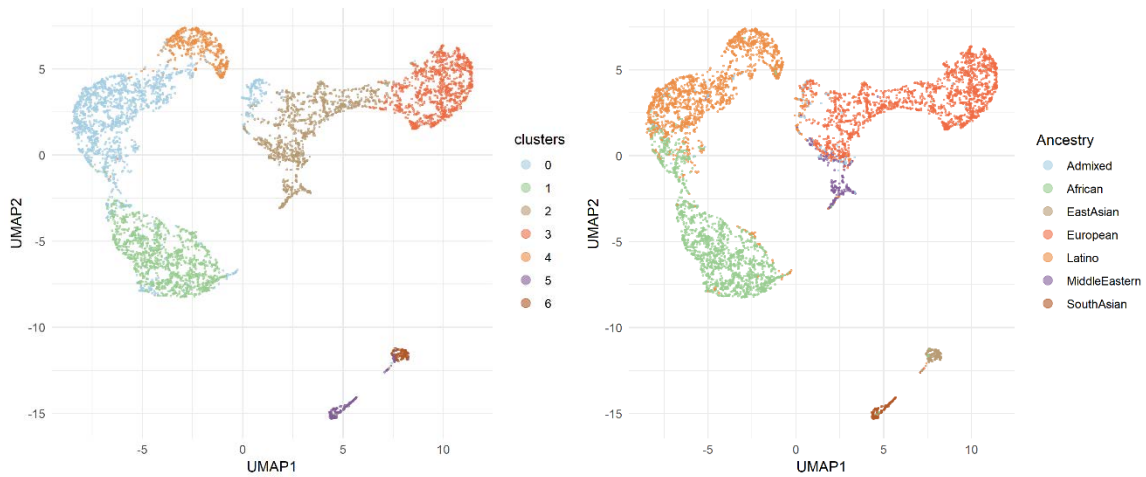

| Cluster | Cases | Controls |
|---------|-------|----------|
| 0       | 13    | 1709     |
| 1       | 37    | 1205     |
| 2       | 32    | 1009     |
| 3       | 30    | 1006     |
| 4       | 3     | 510      |
| 5       | NA    | 170      |
| 6       | 1     | 136      |

**Fig. S1. UMAP and cluster assignment of SETRS and controls**

UMAP and cluster assignments with genetically determined ancestry of SETRS cases and controls. Clusters highlighted in red were excluded from the analysis due to insufficient sample size.

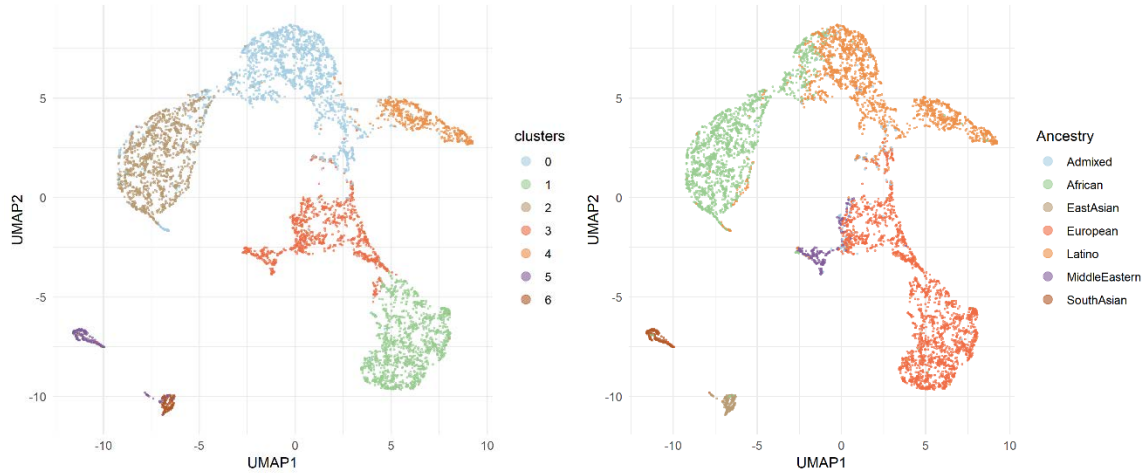

| Cluster | Cases | Controls |
|---------|-------|----------|
| 0       | 8     | 1705     |
| 1       | 153   | 1102     |
| 2       | 8     | 1204     |
| 3       | 49    | 913      |
| 4       | 6     | 515      |
| 5       | 7     | 170      |
| 6       | NA    | 136      |

**Fig. S2. UMAP and cluster assignment of typical schizophrenia and controls**

UMAP and cluster assignments with genetically determined ancestry of typical schizophrenia cases and controls. Clusters highlighted in red were excluded from the analysis due to insufficient sample size and lack of corresponding SETRS cluster.

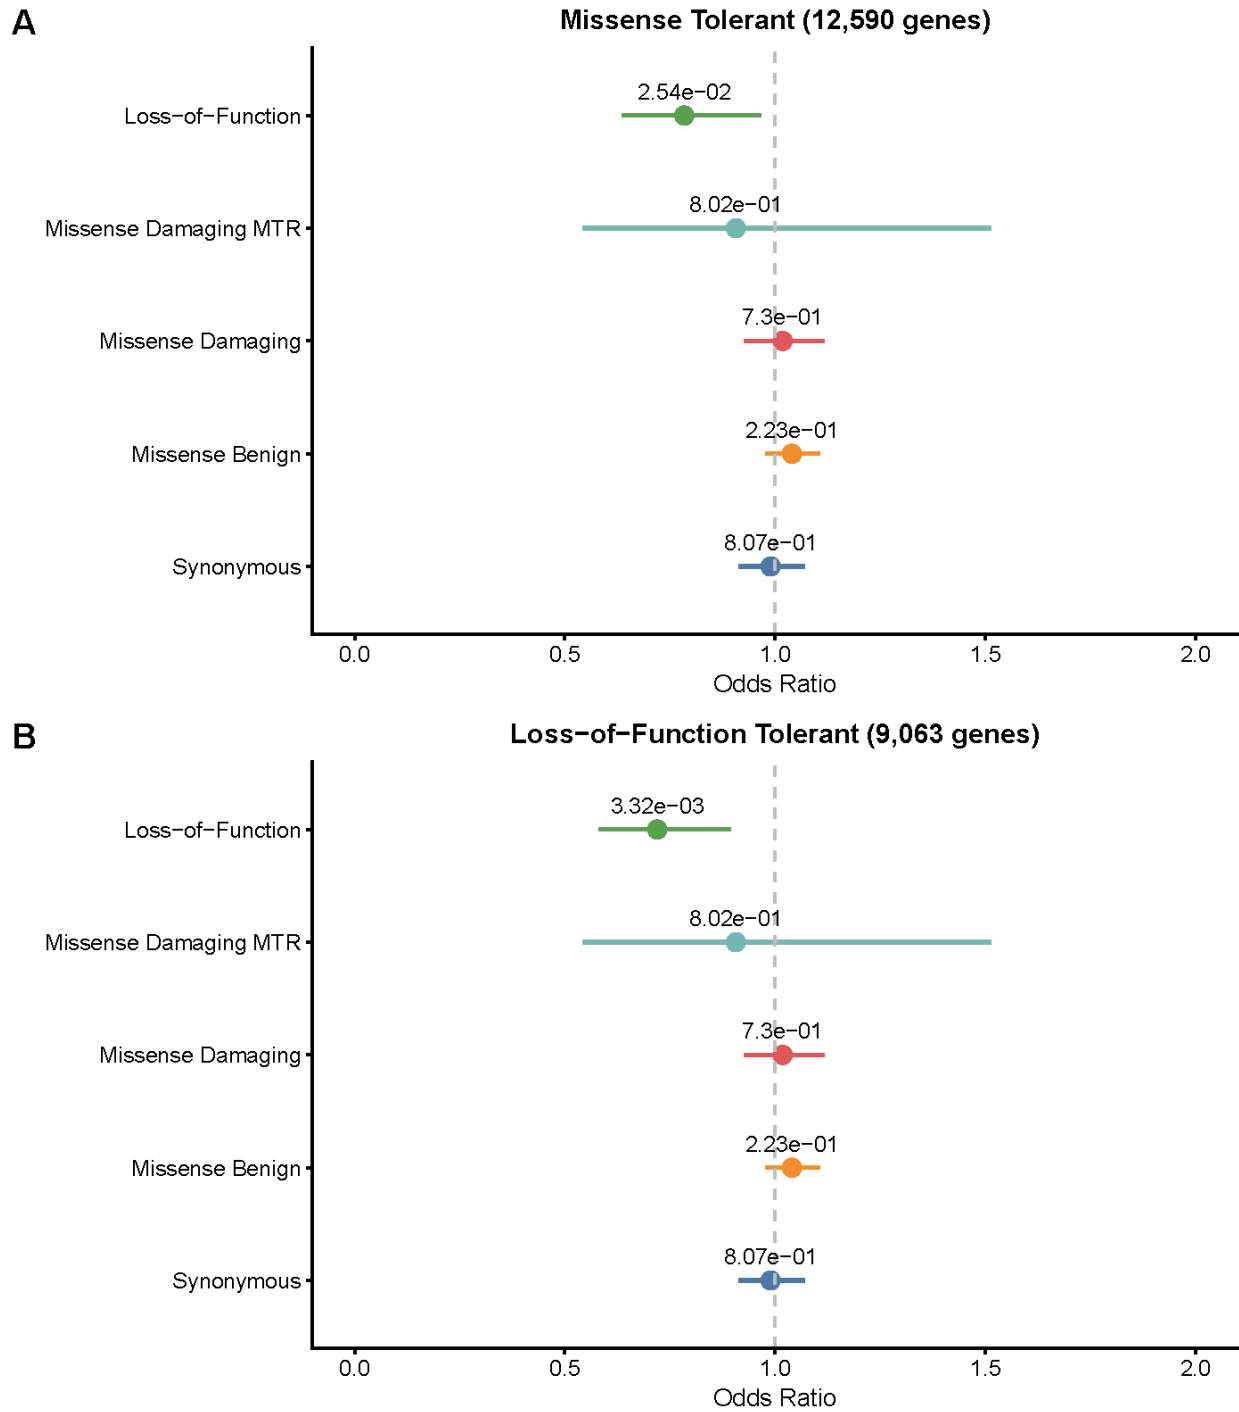

**Fig. S3. Burden of rare variants in tolerant genes**

The burden of rare variants in missense and loss-of-function (LoF) tolerant genes in 112 SETRS cases and 4,929 controls. **A.** Missense tolerant genes were those with missense  $Z < 1$  and **B.** LoF tolerant genes were those with probability of being loss-of-function intolerant (pLI) score  $<$

0.001 in gnomAD. Missense benign: REVEL score  $< 0.15$ , Missense damaging: REVEL score  $> 0.5$ , Missense damaging MTR: REVEL score  $> 0.5$  and missense tolerance ratio false discovery rate (MTR FDR)  $< 0.1$ . Unadjusted two-sided Cochran–Mantel–Haenszel exact  $p$  values and horizontal bars indicating 95% confidence intervals are shown.



**A**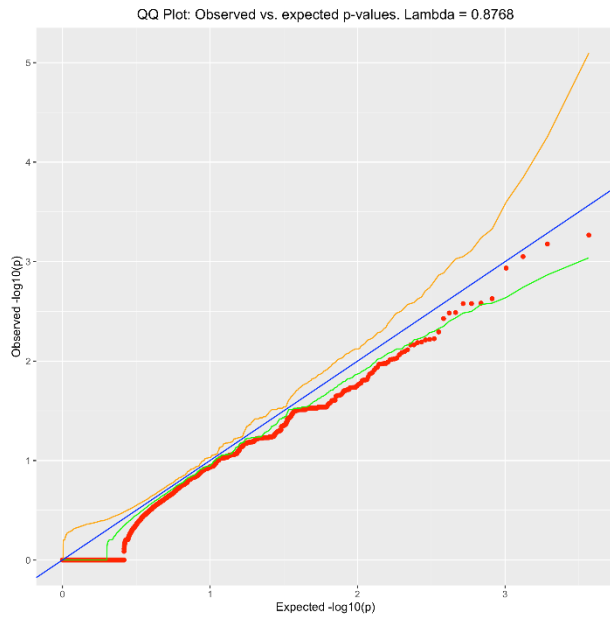**Synonymous Model****B**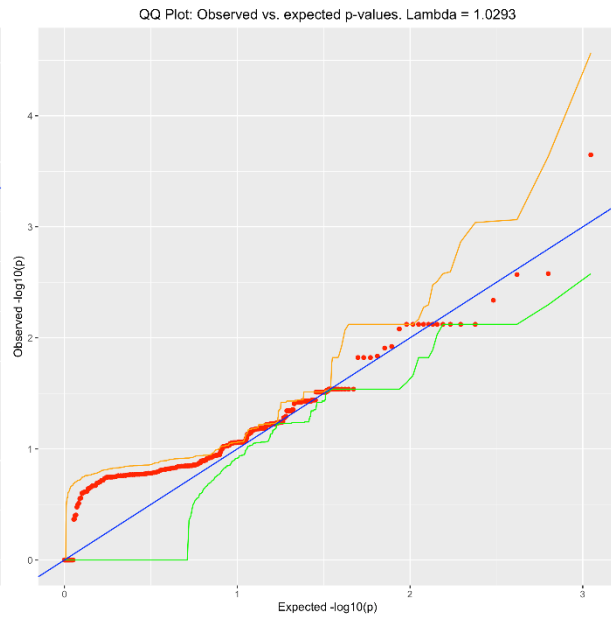**LoF Model****C**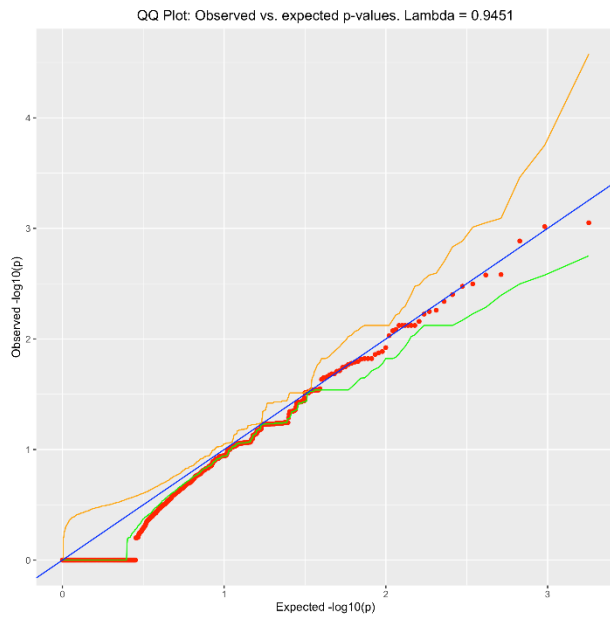**Damaging Missense (REVEL>0.5) Model****D**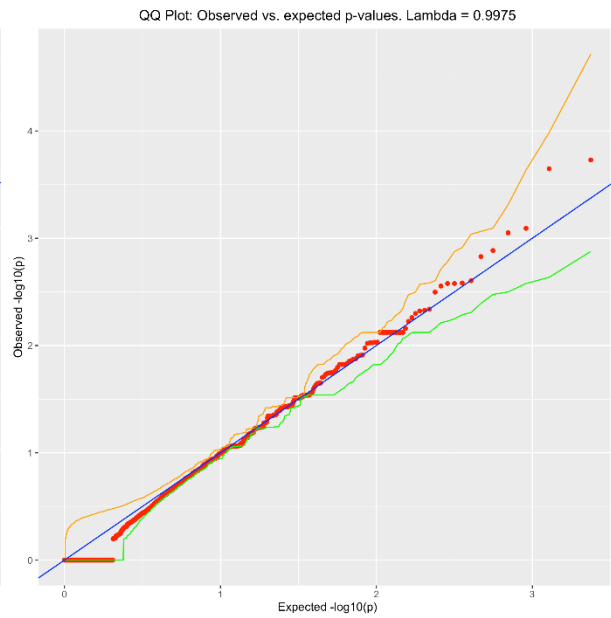**Damaging Missense + LoF Model****Fig. S4. SETRS gene-based rare variant collapsing analysis Q-Q plots**

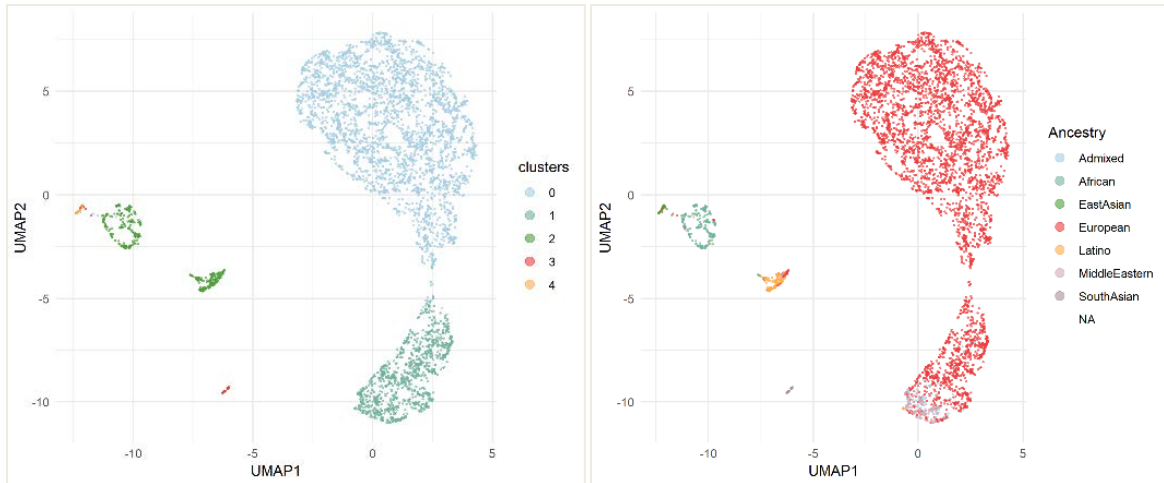

| Cluster | Cases | Controls |
|---------|-------|----------|
| 0       | 28    | 2937     |
| 1       | 33    | 925      |
| 2       | 53    | 284      |
| 3       | 1     | 45       |
| 4       | 1     | 31       |

**Fig. S5. UMAP and Cluster Assignment of SETRS and controls for genome-only analysis**

UMAP and cluster assignments with genetically determined ancestry of SETRS cases and whole genome sequenced controls. Clusters highlighted in red were excluded from the analysis due to insufficient sample size.

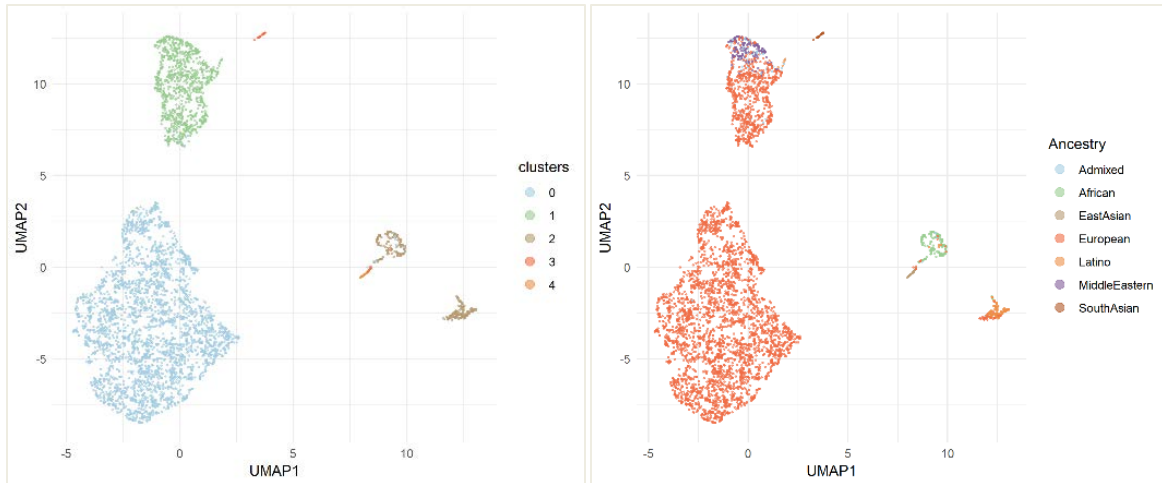

| Cluster | Cases | Controls |
|---------|-------|----------|
| 0       | 136   | 2939     |
| 1       | 48    | 922      |
| 2       | 14    | 283      |
| 3       | 2     | 47       |
| 4       | NA    | 31       |

**Fig. S6. UMAP and Cluster Assignment of typical schizophrenia and controls for genome-only analysis**

UMAP and cluster assignments with genetically determined ancestry of typical schizophrenia cases and whole genome sequenced controls. Clusters highlighted in red were excluded from the analysis due to insufficient sample size.

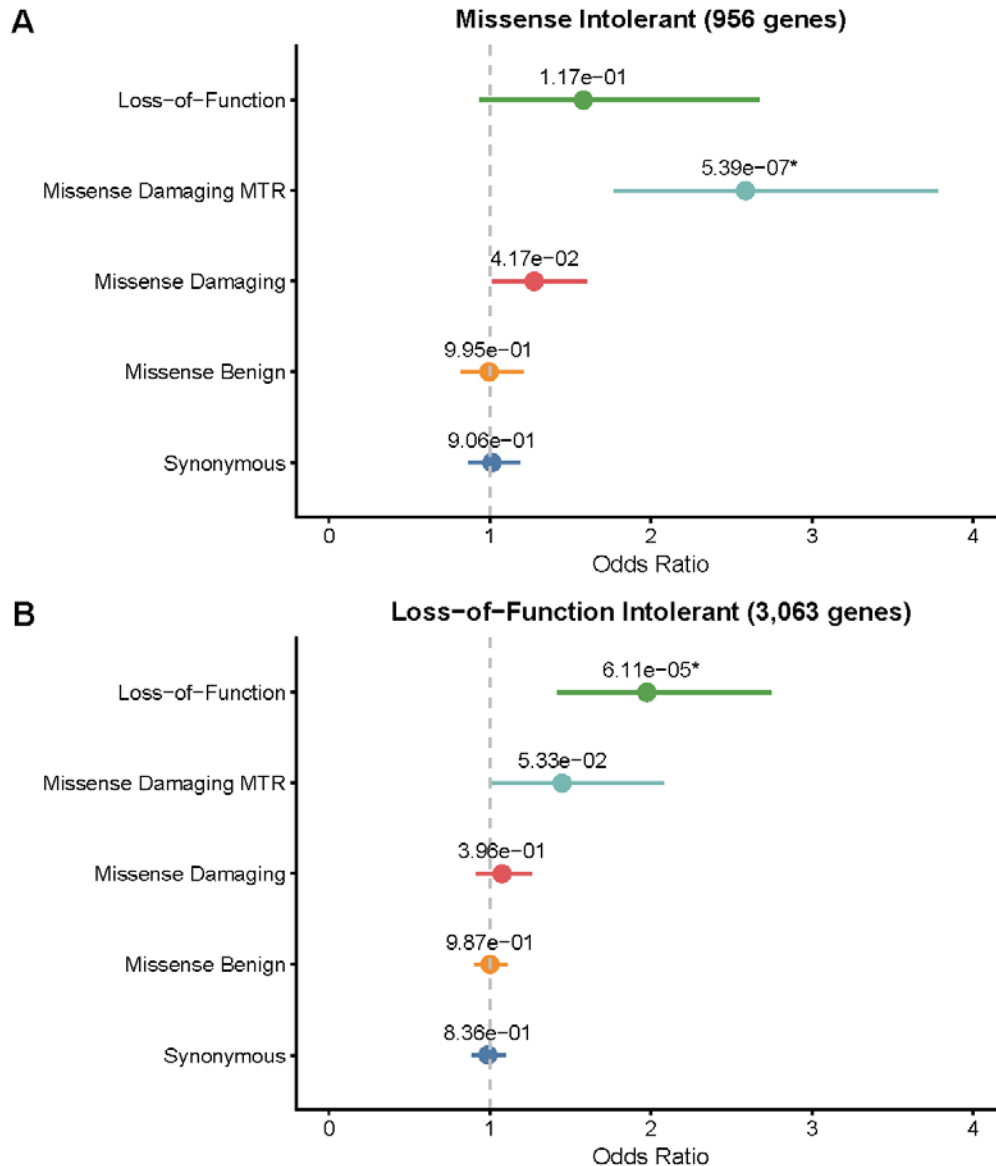

**Fig. S7 Burden of rare variants in intolerant genes for genome-only analysis**

The burden of rare variants in missense and loss-of-function intolerant genes in 114 SETRS cases and 4,146 whole genome sequenced controls. **(A)** Missense intolerant genes were those with missense  $Z > 3.09$  and **(B)** loss-of-function intolerant genes were those with probability of being loss-of-function intolerant (pLI) score  $> 0.9$  as per gnomAD. Missense benign: REVEL score  $< 0.15$ , Missense damaging: REVEL score  $> 0.5$ , Missense damaging MTR: REVEL score  $> 0.5$  and missense tolerance ratio false discovery rate (MTR FDR)  $< 0.1$ . Unadjusted two-sided Cochran–Mantel–Haenszel exact  $p$  values and horizontal bars indicating 95% confidence intervals are shown. \*: FDR  $< 0.1$

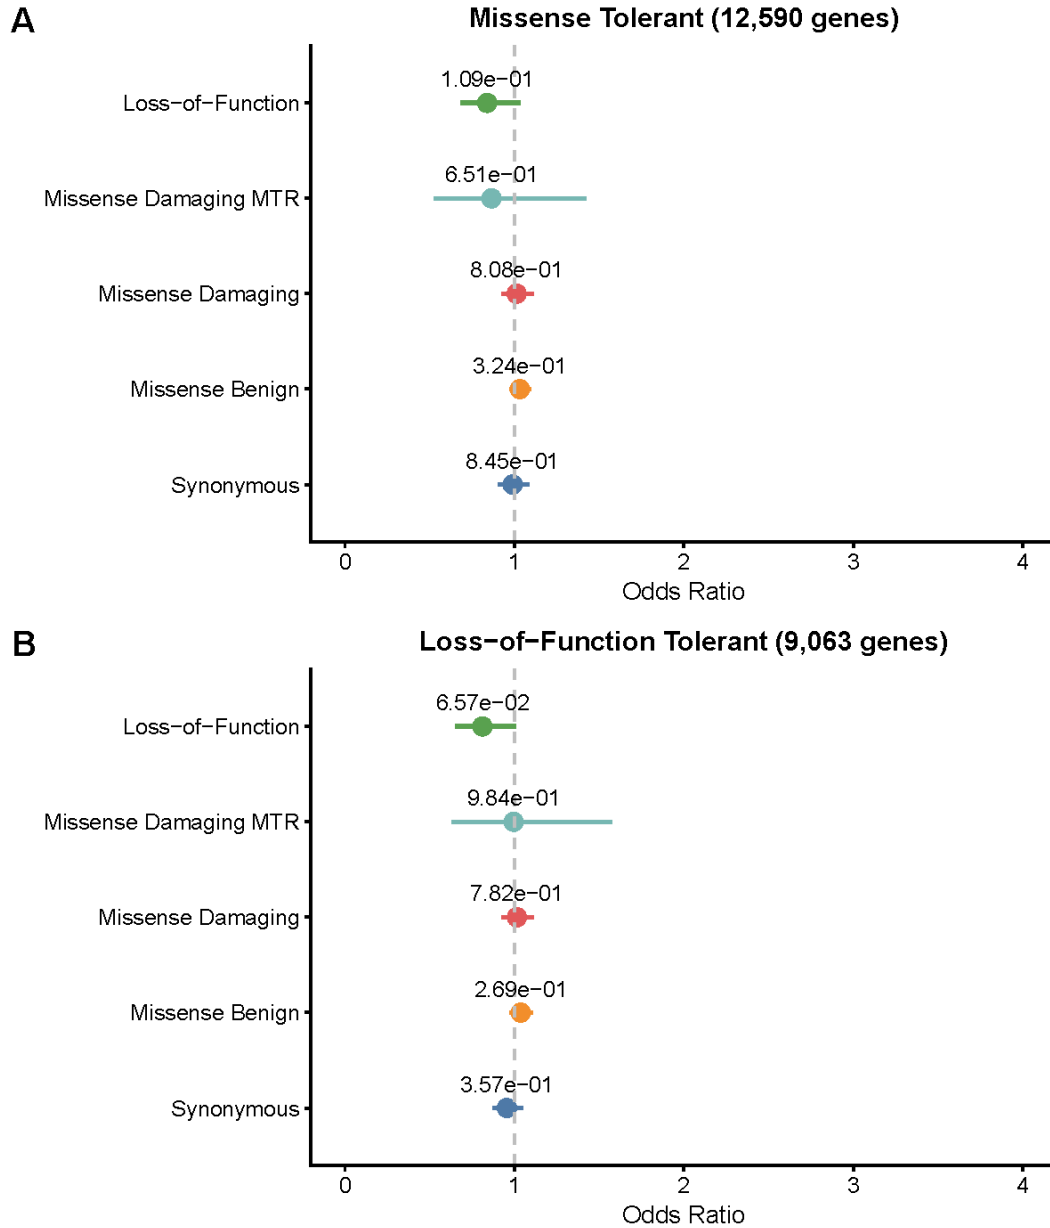

**Fig. S8. Burden of rare variants in tolerant genes for genome-only analysis**

The burden of rare variants in missense and loss-of-function (LoF) tolerant genes in 114 SETRS cases and 4,146 whole genome sequenced controls. **A.** Missense tolerant genes were those with missense  $Z < 1$  and **B.** LoF tolerant genes were those with probability of being loss-of-function intolerant (pLI) score  $< 0.001$  in gnomAD. Missense benign: REVEL score  $< 0.15$ , Missense damaging: REVEL score  $> 0.5$ , Missense damaging MTR: REVEL score  $> 0.5$  and missense tolerance ratio false discovery rate (MTR FDR)  $< 0.1$ . Unadjusted two-sided Cochran–Mantel–Haenszel exact  $p$  values and horizontal bars indicating 95% confidence intervals are shown.

**A**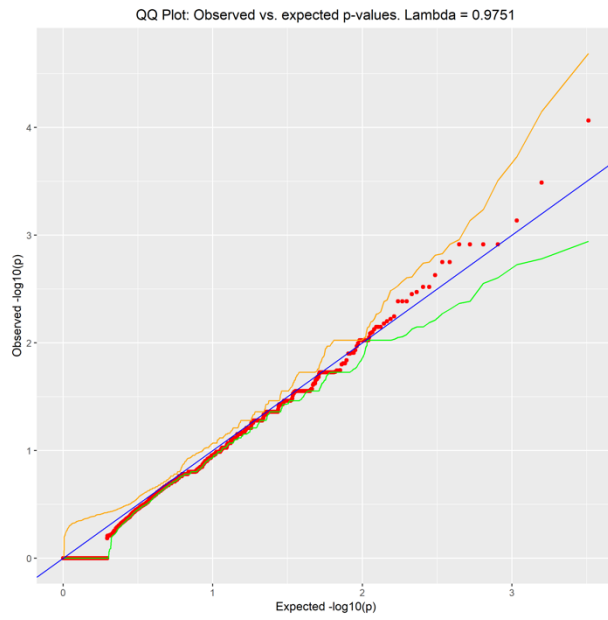**Synonymous Model****B**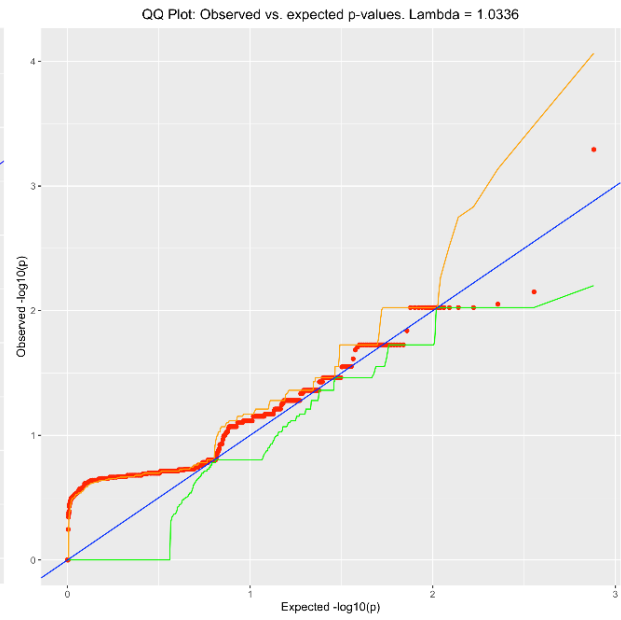**LoF Model****C**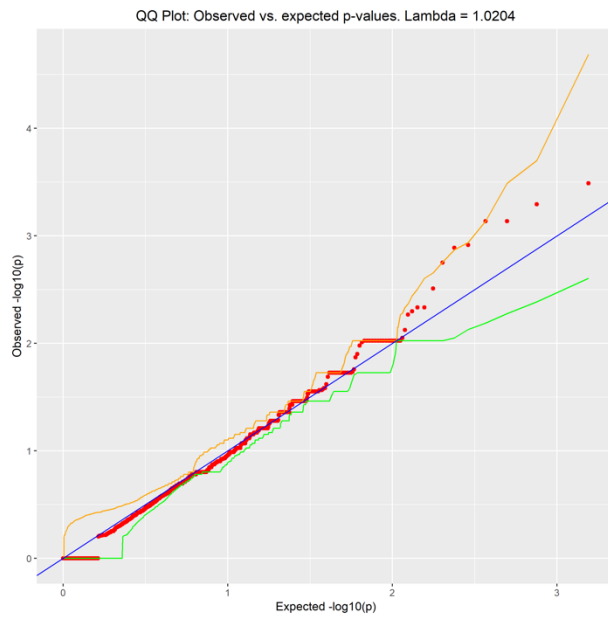**Damaging Missense (REVEL>0.5) Model****D**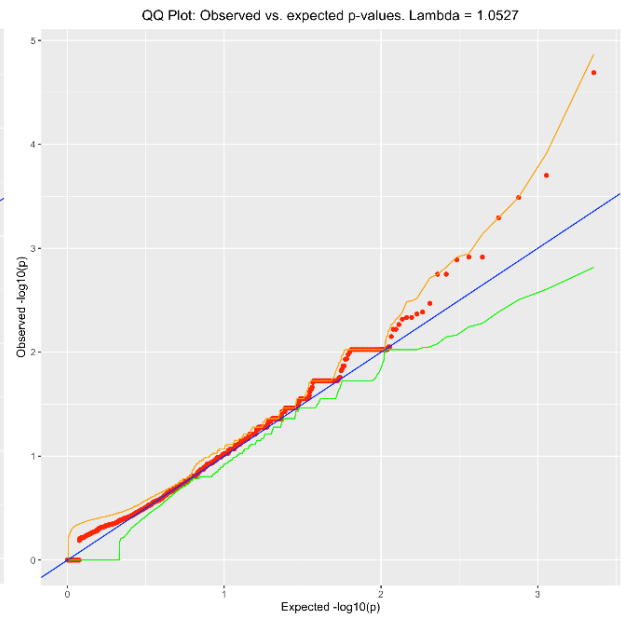**Damaging Missense + LoF Model**

**Fig. S9. SETRS gene-based rare variant collapsing analysis Q-Q plots for genome-only analysis**

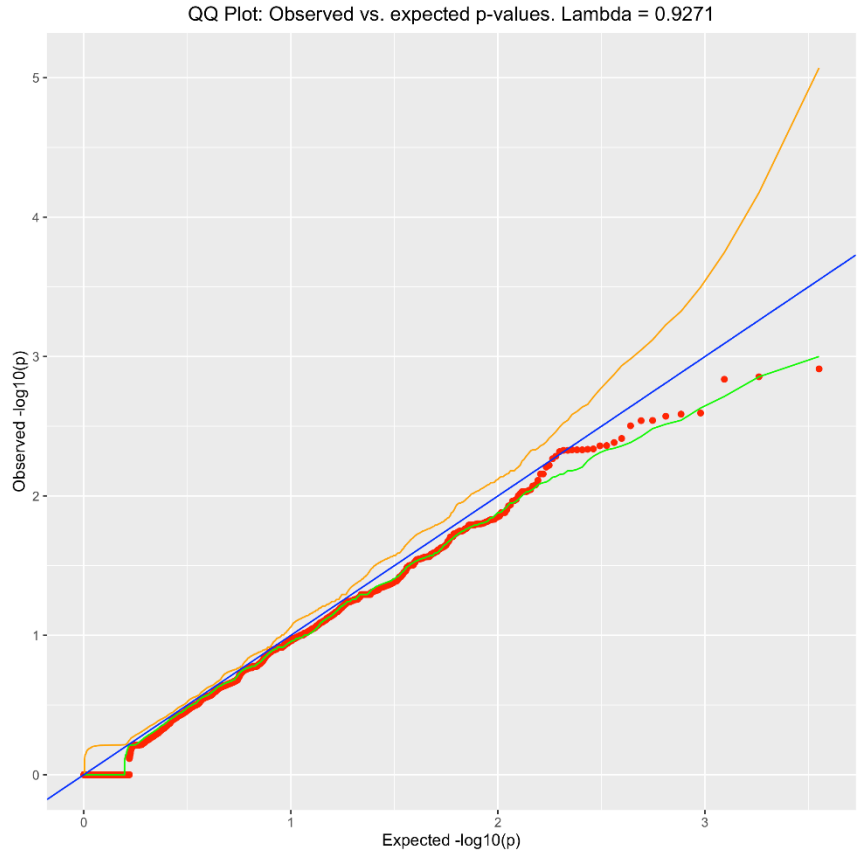

**Fig. S10. Synonymous Q-Q plot for typical schizophrenia vs. controls**

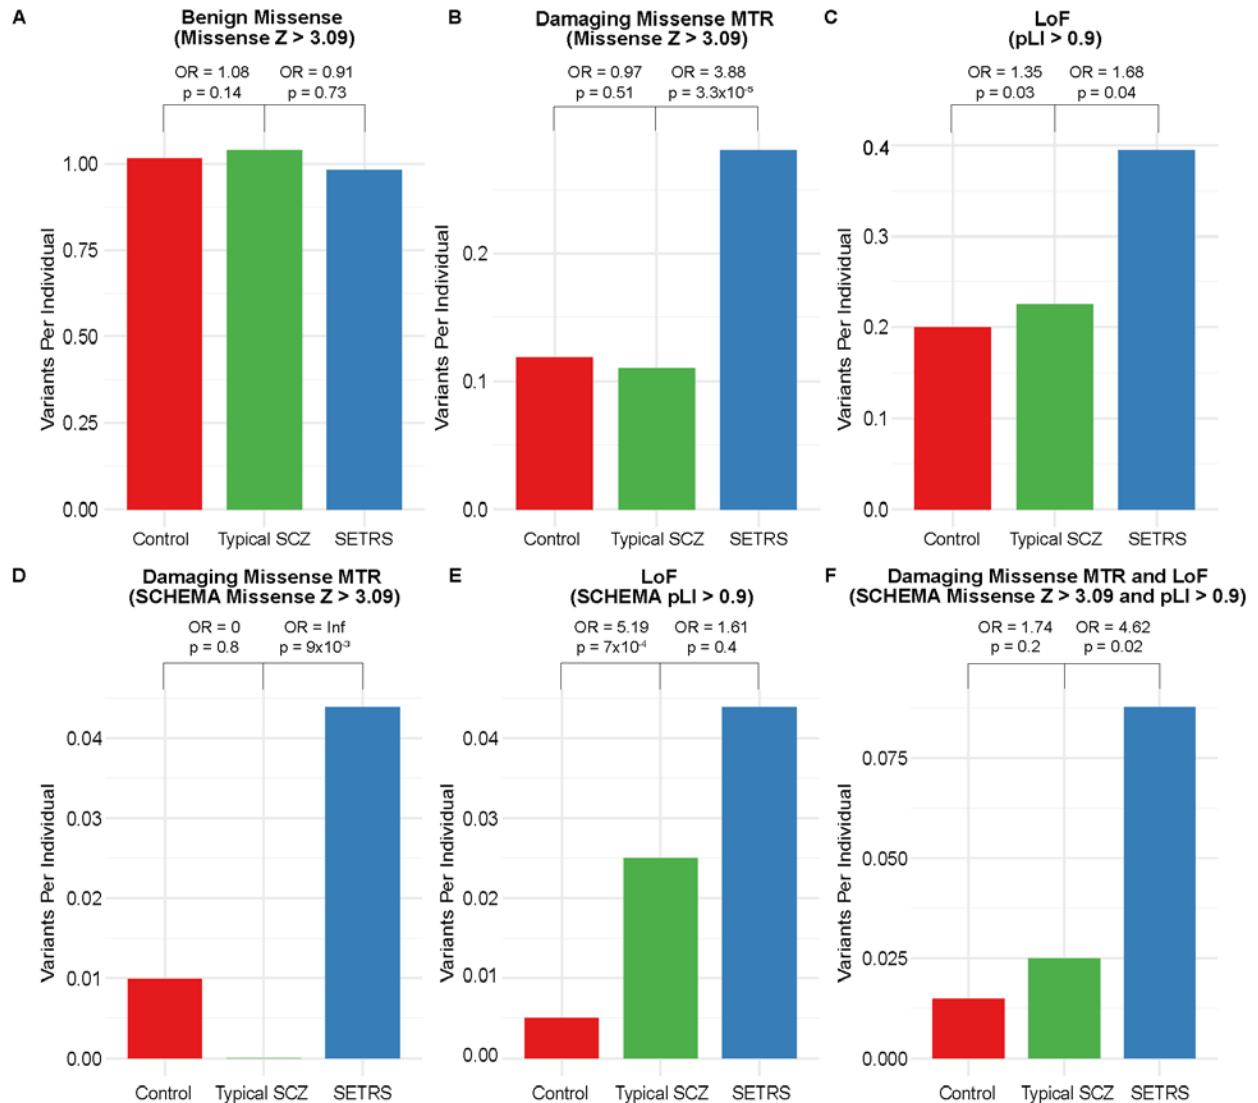

**Fig. S11. Burden of rare variants in SETRS compared to typical schizophrenia and control individuals for genome-only analysis**

(A) No difference observed between SETRS, typical SCZ, and controls for benign missense variants. (B) Increased burden of damaging missense MTR variants in SETRS compared to typical SCZ in missense intolerant genes. (C) Increased burden of loss-of-function variants in SETRS compared to typical SCZ in loss-of-function intolerant genes. (D) Increased burden of damaging missense MTR variants in SETRS compared to typical SCZ in missense intolerant SCHEMA genes. (E) Nonsignificant increase in burden of loss-of-function variants in SETRS compared to typical SCZ in loss-of-function intolerant SCHEMA genes. (F) Increased burden of damaging missense MTR and loss-of-function in SETRS compared to typical SCZ in intolerant



SCHEMA genes. Odds ratios (OR) and  $p$  values shown are based on a comparison of typical SCZ individuals to controls and SETRS individuals to typical SCZ using one-sided Cochran–Mantel–Haenszel test. Benign missense: missense variants with REVEL score  $< 0.15$ , Missense damaging MTR: missense variants with REVEL score  $> 0.5$  and missense tolerance ratio false discovery rate (MTR FDR)  $< 0.1$ .

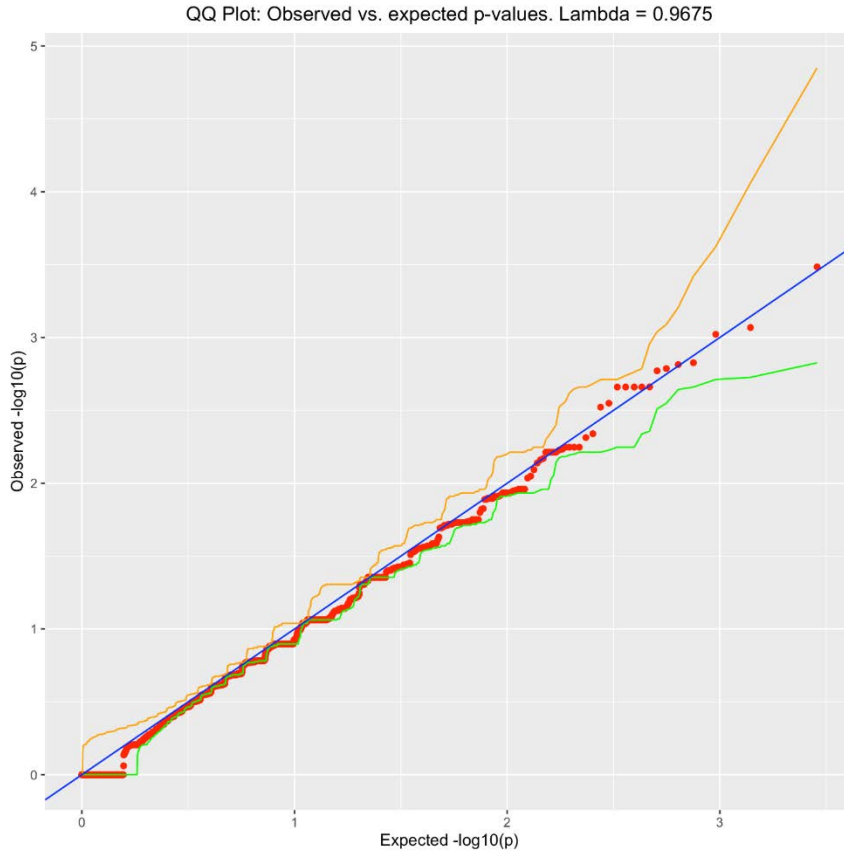

**Fig. S12. Synonymous Q-Q plot for typical schizophrenia vs. controls for genome only analysis**

**Table S1. Control and typical schizophrenia phenotypes and sequencing type**

| <b>Phenotype</b>                                              | <b>Whole Exome Sequencing</b> | <b>Whole Genome Sequencing</b> |
|---------------------------------------------------------------|-------------------------------|--------------------------------|
| Healthy Control                                               | 2637                          | 33                             |
| Healthy Family Member of Proband with Non-Psychiatric Illness | 2207                          | 52                             |
| Typical Schizophrenia                                         | 25                            | 193                            |

**Table S2. Case and control cohort ancestries**

| <b>Cohort</b>         | <b>Admixed</b> | <b>African</b> | <b>European</b> | <b>Latino</b> | <b>Middle Eastern</b> |
|-----------------------|----------------|----------------|-----------------|---------------|-----------------------|
| SETRS                 | 15             | 39             | 50              | 8             | 0                     |
| Typical Schizophrenia | 13             | 10             | 189             | 5             | 1                     |
| Controls              | 473            | 1590           | 1700            | 1121          | 45                    |

**Table S3. Control phenotypes for genome-only analysis**

| <b>Phenotype</b>                                   | <b>N</b>     |
|----------------------------------------------------|--------------|
| IgA nephropathy                                    | 247          |
| Membranous Nephropathy                             | 239          |
| Nephritis                                          | 93           |
| Parents of children with posterior urethral valves | 161          |
| Posterior Urethral valves                          | 7            |
| Adults with HIV                                    | 118          |
| Adults with amyotrophic lateral sclerosis          | 3,281        |
| <b>Total</b>                                       | <b>4,146</b> |

**Table S4. Case and control cohort ancestries for genome-only analysis**

| <b>Cohort</b>         | <b>Admixed</b> | <b>African</b> | <b>European</b> | <b>Latino</b> | <b>Middle Eastern</b> |
|-----------------------|----------------|----------------|-----------------|---------------|-----------------------|
| SETRS                 | 14             | 39             | 50              | 11            | 0                     |
| Typical Schizophrenia | 10             | 2              | 176             | 9             | 1                     |
| Controls              | 272            | 145            | 3627            | 101           | 1                     |

**Table S5. Qualifying Loss-of-Function Variants in Online Mendelian Inheritance in Man (OMIM) Genes**

| <b>Gene</b>   | <b>Variant</b>      | <b>OMIM Phenotype (Inheritance)</b>                                                                    | <b>ACMG determination and rationale</b>                                                                                |
|---------------|---------------------|--------------------------------------------------------------------------------------------------------|------------------------------------------------------------------------------------------------------------------------|
| <i>C3</i>     | 19-6678035-C-T      | C3 Deficiency (AR)                                                                                     | VOUS - AR disease                                                                                                      |
| <i>CSNK1D</i> | 17-80207447-C-CG    | Advanced Sleep Phase, Familial (AD)                                                                    | VOUS- Missense driven disease                                                                                          |
| <i>DIS3L2</i> | 2-233001277-CCT-C   | Perlman Syndrome (AR)                                                                                  | VOUS - AR disease                                                                                                      |
| <i>DST</i>    | 6-56498989-C-CT     | Neuropathy, sensory/autonomic (AR) and Epidermolysis bullosa simplex (AR)                              | VOUS - AR disease                                                                                                      |
| <i>FBXO11</i> | 2-48132709-GCT-G    | Intellectual Developmental Disorder with Dysmorphic Facies and Behavioral Abnormalities (AD)           | VOUS – canonical transcript is less expressed than others, no pathogenic LoF variants in this exon, no phenotype match |
| <i>FOXP2</i>  | 7-114284810-G-T     | Childhood speech dyspraxia (AD)                                                                        | Pathogenic                                                                                                             |
| <i>KLC2</i>   | 11-66031422-A-AG    | Spastic Paraparesis and Optic Atrophy (AR)                                                             | VOUS - AR disease                                                                                                      |
| <i>NR4A3</i>  | 9-102590382-C-T     | Chondrosarcoma susceptibility (AD)                                                                     | VOUS - Susceptibility locus, mutational mechanism is gene fusion                                                       |
| <i>PRKCG</i>  | 19-54403863-A-T     | Spinocerebellar Ataxia 14 (AD)                                                                         | VOUS -Missense driven disease                                                                                          |
| <i>RLIM</i>   | X-73811754-T-TGGAA  | X Linked ID/Behavior Disorder (X-linked)                                                               | VOUS - X-Linked carrier                                                                                                |
| <i>SETX</i>   | 9-135187206-TTCTC-T | Amyotrophic lateral sclerosis (ALS), juvenile (AD), Spinocerebellar ataxia with axonal neuropathy (AR) | VOUS - ALS is missense driven, ataxia is AR disease                                                                    |
| <i>SCARF2</i> | 22-20783543-C-CG    | Van den Ende-Gupta/Marden Walker Syndrome (AR)                                                         | VOUS - AR disease                                                                                                      |
| <i>TCF7L2</i> | 10-114925401-TC-T   | Diabetes Susceptibility (AD)                                                                           | VOUS - Questionable LoF, no phenotype match                                                                            |

|              |                                      |                                                                     |                                               |
|--------------|--------------------------------------|---------------------------------------------------------------------|-----------------------------------------------|
| <i>TRIM2</i> | 4-154191485-AG-A                     | Charcot Marie Tooth, Type 2R (AR)                                   | VOUS - AR disease and missense driven disease |
| <i>WBP11</i> | 12-14943528-G-A                      | Vertebral, cardiac, tracheoesophageal, renal, and limb defects (AD) | Likely Pathogenic                             |
| <i>ZFHX2</i> | 14-23994453-<br>TTCAGGGGCACGGG<br>-T | Marsili Syndrome (AD pain insensitivity syndrome)                   | VOUS - Missense driven phenotype              |



**Table S6. Qualifying Missense Variants in Online Mendelian Inheritance in Man (OMIM) Genes**

| <b>Gene</b>    | <b>Variant</b>   | <b>OMIM Phenotype (Inheritance)</b>                | <b>ACMG Determination and Rationale</b>                                                                    |
|----------------|------------------|----------------------------------------------------|------------------------------------------------------------------------------------------------------------|
| <i>ACACA</i>   | 17-35627664-T-G  | Acetyl-CoA carboxylase deficiency (AR)             | VOUS - No pathogenic missense variants, AR inheritance                                                     |
| <i>ACTN4</i>   | 19-39212264-G-A  | FSGS (AD)                                          | VOUS - No nearby pathogenic variants                                                                       |
| <i>CACNA1C</i> | 12-2717777-A-G   | Timothy Syndrome (AD), Brugada Syndrome (AD)       | VOUS - No nearby pathogenic variants                                                                       |
| <i>CHD8</i>    | 14-21866091-T-C  | Autism (AD)                                        | VOUS - No nearby pathogenic variants                                                                       |
| <i>GABRA2</i>  | 4-46263990-T-C   | Alcohol Dependence, Epileptic Encephalopathy (AD)  | VOUS - No nearby pathogenic variants                                                                       |
| <i>JAG1</i>    | 20-10625568-C-T  | Alagille Syndrome (AD)                             | VOUS – No nearby pathogenic variants                                                                       |
| <i>KCNA1</i>   | 12-5021197-C-G   | Episodic ataxia/myokymia syndrome (AD)             | VOUS – No nearby pathogenic variants                                                                       |
| <i>KCNB1</i>   | 20-48098611-C-T  | Epileptic encephalopathy (AD)                      | VOUS – No nearby pathogenic variants                                                                       |
| <i>MED23</i>   | 6-131917146-G-A  | Mental Retardation (AR)                            | VOUS – No nearby pathogenic variants, AR inheritance                                                       |
| <i>NTRK2</i>   | 9-87570260-C-T   | Obesity, Hyperphagia, and Developmental Delay (AD) | VOUS – No nearby pathogenic variants                                                                       |
| <i>PIK3CD</i>  | 1-9787026-T-A    | Immunodeficiency (AD)                              | VOUS - Pathogenic missense variant for immunodeficiency is 3 base pairs away but on a different amino acid |
| <i>PLCB1</i>   | 20-8709793-G-C   | Epileptic Encephalopathy (EE) (AR)                 | VOUS – Epileptic encephalopathy with AR inheritance due to LoF                                             |
| <i>POLR3B</i>  | 12-106895135-G-A | Leukodystrophy, hypomyelinating, 8 (AR)            | VOUS - No nearby pathogenic missense variants and AR inheritance                                           |

|                |                 |                                                                         |                                                                                                       |
|----------------|-----------------|-------------------------------------------------------------------------|-------------------------------------------------------------------------------------------------------|
| <i>PPP3CA</i>  | 4-102030139-T-C | EE (AD), Arthrogryposis/ ID (AD)                                        | VOUS – No nearby pathogenic variants                                                                  |
| <i>PTEN</i>    | 10-89653847-A-G | Cowden Syndrome, Macrocephaly/Autism (AD)                               | VOUS - in a mutational hotspot with 20 pathogenic and 2 benign, adjacent AA has a pathogenic variant. |
| <i>SMARCA2</i> | 9-2039708-G-A   | Nicolaides-Baraitser syndrome (AD)                                      | VOUS - No nearby pathogenic missense variants                                                         |
| <i>SMARCA2</i> | 9-2073297-C-T   | Nicolaides-Baraitser syndrome (AD)                                      | VOUS - No nearby pathogenic missense variants                                                         |
| <i>VCP</i>     | 9-35061044-T-G  | Inclusion Body Myopathy (AD), Charcot-Marie-Tooth Disease, Type 2Y (AD) | VOUS - No nearby pathogenic missense variants                                                         |

**Table S7. Qualifying missense and loss-of-function variants with reported genotype-phenotype associations**

| Gene           | Variant Type | SCZ, DD, ASD  | OMIM Disease Phenotype [Inheritance Pattern]                                                                  |
|----------------|--------------|---------------|---------------------------------------------------------------------------------------------------------------|
| <i>ABCA2</i>   | Missense     | SCZ (Miss)    | -                                                                                                             |
| <i>ACACA</i>   | Missense     | -             | Acetyl-CoA Carboxylase Deficiency [AR]                                                                        |
| <i>ACTN4</i>   | Missense     | -             | Focal Segmental Glomerulosclerosis [AD]                                                                       |
| <i>CACNA1C</i> | Missense     | DD            | Timothy Syndrome [AD]                                                                                         |
| <i>CHD5</i>    | Missense     | SCZ (Miss)    | -                                                                                                             |
| <i>CHD8</i>    | Missense     | DD, ASD       | -                                                                                                             |
| <i>DPYSL2</i>  | Missense     | ASD           | -                                                                                                             |
| <i>GABRA2</i>  | Missense     |               | Alcohol Dependence, Epileptic Encephalopathy [AD]                                                             |
| <i>GRM5</i>    | Missense     | SCZ (Miss)    | -                                                                                                             |
| <i>IPO5</i>    | Missense     | SCZ (Miss)    | -                                                                                                             |
| <i>JAG1</i>    | Missense     | -             | Alagille Syndrome [AD]   Tetralogy of Fallot [AD]                                                             |
| <i>KCNA1</i>   | Missense     | -             | Episodic Ataxia, Type 1 [AD]                                                                                  |
| <i>KCNB1</i>   | Missense     | DD            | Epileptic Encephalopathy, Early infantile [AD]                                                                |
| <i>MED23</i>   | Missense     |               | Mental Retardation [AR]                                                                                       |
| <i>NTRK2</i>   | Missense     |               | Obesity, Hyperphagia, and Developmental Delay [AD]                                                            |
| <i>PIK3CD</i>  | Missense     | SCZ (Miss)    | Immunodeficiency [AD]                                                                                         |
| <i>PLCB1</i>   | Missense     | -             | Epileptic Encephalopathy, Early Infantile [AR]                                                                |
| <i>POLR3B</i>  | Missense     | -             | Hypomyelinating Leukodystrophy with/without oligodontia and/or Hypogonadotropic Hypogonadism [AR]             |
| <i>PPP3CA</i>  | Missense     | SCZ (LoF), DD | Epileptic Encephalopathy [AR]   Arthrogyriposis, Cleft Palate, Craniosynostosis and Impaired Development [AR] |

|                       |          |           |                                                                                                   |
|-----------------------|----------|-----------|---------------------------------------------------------------------------------------------------|
| <b><i>PTEN</i></b>    | Missense | DD, ASD   | Cowden Syndrome [AD]   Macrocephaly/Autism Syndrome [AD]                                          |
| <b><i>SMARCA2</i></b> | Missense | DD        | Nicolaides-Baraitser Syndrome [AD]                                                                |
| <b><i>SMARCA2</i></b> | Missense | DD        | Nicolaides-Baraitser Syndrome [AD]                                                                |
| <b><i>AKAP11</i></b>  | LoF      | SCZ (LoF) | -                                                                                                 |
| <b><i>C3</i></b>      | LoF      | -         | C3 Deficiency [AR]                                                                                |
| <b><i>CSNK1D</i></b>  | LoF      | -         | Familial Advanced Sleep Phase Syndrome [AD]                                                       |
| <b><i>DIS3L2</i></b>  | LoF      | -         | Perlman Syndrome [AR]                                                                             |
| <b><i>DST</i></b>     | LoF      | -         | Hereditary Neuropathy Sensory and Autonomic, Type VI [AR]   Epidermolysis Bullosa Simplex [AR]    |
| <b><i>FBXO11</i></b>  | LoF      | DD        | Intellectual Developmental Disorder with Dysmorphic Facies and Behavioral Abnormalities [AD]      |
| <b><i>FOXP2</i></b>   | LoF      | DD, ASD   | Speech-Language Disorder [AD]                                                                     |
| <b><i>HMGCR</i></b>   | LoF      | SCZ (LoF) | -                                                                                                 |
| <b><i>KLC2</i></b>    | LoF      | -         | Spastic Paraplegia, Optic Atrophy, and Neuropathy [AR]                                            |
| <b><i>PRKCG</i></b>   | LoF      | -         | Spinocerebellar Ataxia [AD]                                                                       |
| <b><i>PTK2</i></b>    | LoF      | SCZ (LoF) | -                                                                                                 |
| <b><i>PUM2</i></b>    | LoF      | SCZ (LoF) | -                                                                                                 |
| <b><i>RLIM</i></b>    | LoF      | -         | Tonne-Kalscheuer Syndrome [X-linked]                                                              |
| <b><i>SCARF2</i></b>  | LoF      | -         | Van Den Ende-Gupta Syndrome [AR]                                                                  |
| <b><i>SETX</i></b>    | LoF      | -         | Amyotrophic Lateral Sclerosis, Juvenile [AD]   Spinocerebellar Ataxia with Axonal Neuropathy [AR] |
| <b><i>TCF7L2</i></b>  | LoF      | DD, ASD   | Diabetes Mellitus, Non-Insulin-Dependent [AD]                                                     |
| <b><i>TERF1</i></b>   | LoF      | SCZ (LoF) | -                                                                                                 |
| <b><i>TRIM2</i></b>   | LoF      | -         | Axonal Charcot-Marie-Tooth Disease, Type 2R [AR]                                                  |

|                     |     |   |                                                                     |
|---------------------|-----|---|---------------------------------------------------------------------|
| <b><i>WBP11</i></b> | LoF | - | Vertebral, Cardiac, Tracheoesophageal, Renal, and Limb defects [AD] |
| <b><i>ZFHX2</i></b> | LoF | - | Marsili Syndrome [AD]                                               |

Qualifying missense and loss-of-function variants in intolerant genes (missense  $Z > 3.09$  and  $pLI > 0.9$ , respectively) with known genotype-phenotype relationships. SCZ (Miss): Gene with evidence of enrichment for missense variation in the SCHEMA study of schizophrenia (n = 45 genes). SCZ (LoF): Gene with prior evidence of enrichment for loss-of-function variation in SCHEMA (n = 75 genes). DD: One of 299 genome-wide significant genes associated with developmental delay. ASD: One of 102 genome-wide significant genes associated with autism spectrum disorder. OMIM: Genes known to cause Mendelian disorders based on the Online Mendelian Inheritance in Man database. Of these qualifying variants in OMIM genes, only the loss-of-function variants in FOXP2 and WBP11 meet American College of Medical Genetics (ACMG) diagnostic criteria for a “pathogenic” or “likely pathogenic” variant. AR: Autosomal Recessive; AD: Autosomal Dominant

**Table S8. Top ten genes from gene-based collapsing models**

| Rank | Gene      | Case QV | Ctrl QV | Case QV Freq % | Ctrl QV Freq % | CMH Exact P Value |
|------|-----------|---------|---------|----------------|----------------|-------------------|
| 1    | 'MTA1'    | 2       | 0       | 1.79           | 0.00           | 8.90E-04          |
| 2    | 'PDE1C'   | 3       | 5       | 2.68           | 0.10           | 9.64E-04          |
| 3    | 'NDUFAF4' | 2       | 1       | 1.79           | 0.02           | 1.30E-03          |
| 4    | 'HDAC6'   | 2       | 1       | 1.79           | 0.02           | 2.62E-03          |
| 5    | 'KCNJ2'   | 2       | 1       | 1.79           | 0.02           | 2.64E-03          |
| 6    | 'MEOX2'   | 2       | 2       | 1.79           | 0.04           | 3.18E-03          |
| 7    | 'CYP39A1' | 2       | 2       | 1.79           | 0.04           | 3.34E-03          |
| 8    | 'B4GALT2' | 2       | 3       | 1.79           | 0.06           | 3.97E-03          |
| 9    | 'HBP1'    | 2       | 4       | 1.79           | 0.08           | 4.58E-03          |
| 10   | 'ZDHHC5'  | 2       | 3       | 1.79           | 0.06           | 5.50E-03          |

Top ten genes from qualifying missense (REVEL > 0.5) collapsing analysis

| Rank | Gene      | Case QV | Ctrl QV | Case QV Freq % | Ctrl QV Freq % | CMH Exact P Value |
|------|-----------|---------|---------|----------------|----------------|-------------------|
| 1    | 'B4GALT2' | 3       | 3       | 2.68           | 0.06           | 1.86E-04          |
| 2    | 'CCDC125' | 2       | 0       | 1.79           | 0.00           | 2.25E-04          |
| 3    | 'PLTP'    | 3       | 4       | 2.68           | 0.08           | 8.09E-04          |
| 4    | 'MTA1'    | 2       | 0       | 1.79           | 0.00           | 8.90E-04          |
| 5    | 'NDUFAF4' | 2       | 1       | 1.79           | 0.02           | 1.30E-03          |
| 6    | 'PDE1C'   | 3       | 6       | 2.68           | 0.12           | 1.48E-03          |
| 7    | 'GPR39'   | 2       | 1       | 1.79           | 0.02           | 2.49E-03          |
| 8    | 'HDAC6'   | 2       | 1       | 1.79           | 0.02           | 2.62E-03          |
| 9    | 'NUP37'   | 2       | 1       | 1.79           | 0.02           | 2.64E-03          |
| 10   | 'KCNJ2'   | 2       | 1       | 1.79           | 0.02           | 2.64E-03          |

Top ten genes from qualifying missense (REVEL > 0.5) and LoF variant collapsing analysis

| Rank | Gene      | Case QV | Ctrl QV | Case QV Freq % | Ctrl QV Freq % | CMH Exact P Value |
|------|-----------|---------|---------|----------------|----------------|-------------------|
| 1    | 'CCDC125' | 2       | 0       | 1.79           | 0              | 2.25E-04          |

|    |           |   |   |      |      |          |
|----|-----------|---|---|------|------|----------|
| 2  | 'NUP37'   | 2 | 1 | 1.79 | 0.02 | 2.64E-03 |
| 3  | 'SLCO4A1' | 2 | 1 | 1.79 | 0.02 | 2.69E-03 |
| 4  | 'HLTF'    | 2 | 4 | 1.79 | 0.08 | 4.58E-03 |
| 5  | 'RAD51D'  | 1 | 0 | 0.89 | 0    | 7.55E-03 |
| 6  | 'UQCRH'   | 1 | 0 | 0.89 | 0    | 7.55E-03 |
| 7  | 'MCMBP'   | 1 | 0 | 0.89 | 0    | 7.55E-03 |
| 8  | 'SCARF2'  | 1 | 0 | 0.89 | 0    | 7.55E-03 |
| 9  | 'VANGL2'  | 1 | 0 | 0.89 | 0    | 7.55E-03 |
| 10 | 'UFSP1'   | 1 | 0 | 0.89 | 0    | 7.55E-03 |

Top ten genes from qualifying LoF variant collapsing analysis

| Rank | Gene        | Case QV | Ctrl QV | Case QV Freq % | Ctrl QV Freq % | CMH Exact P Value |
|------|-------------|---------|---------|----------------|----------------|-------------------|
| 1    | 'LMOD3'     | 3       | 6       | 2.68           | 0.12           | 5.41E-04          |
| 2    | 'WDR63'     | 3       | 5       | 2.68           | 0.10           | 6.65E-04          |
| 3    | 'UGT2B11'   | 2       | 0       | 1.79           | 0.00           | 8.90E-04          |
| 4    | 'AVIL'      | 4       | 16      | 3.57           | 0.32           | 1.16E-03          |
| 5    | 'KIAA1211L' | 3       | 8       | 2.68           | 0.16           | 2.36E-03          |
| 6    | 'CTSG'      | 2       | 1       | 1.79           | 0.02           | 2.62E-03          |
| 7    | 'PRKACG'    | 2       | 1       | 1.79           | 0.02           | 2.64E-03          |
| 8    | 'UTP15'     | 2       | 1       | 1.79           | 0.02           | 2.64E-03          |
| 9    | 'NUDC'      | 2       | 2       | 1.79           | 0.04           | 3.25E-03          |
| 10   | 'FGFBP3'    | 2       | 2       | 1.79           | 0.04           | 3.29E-03          |

Top ten genes from qualifying synonymous variant collapsing analysis

QV: Qualifying variants that pass quality control and filtering

CMH: Cochran–Mantel–Haenszel Test

**Table S9. Qualifying Missense and Loss-of-Function Variants in Intolerant Genes**

| Variant ID                  | Effect                  | HGVS_p       | Gene Name | Sample Name | gnomAD Exome non_neuro_AF | gnomAD Gene pLI | gnomAD Gene mis_z | MTR   | MTR FDR | REVEL |
|-----------------------------|-------------------------|--------------|-----------|-------------|---------------------------|-----------------|-------------------|-------|---------|-------|
| 9-139906176-C-G             | missense_variant        | p.Cys1854Ser | ABCA2     | chapscz099  | NA                        | 1               | 4.91              | 0.563 | 0.007   | 0.682 |
| 17-35627664-T-G             | missense_variant        | p.Asp251Ala  | ACACA     | chapscz046  | NA                        | 1               | 7.24              | 0.479 | 0.093   | 0.861 |
| 19-39212264-G-A             | missense_variant        | p.Glu460Lys  | ACTN4     | chapscz092  | 4.81E-06                  | 1               | 4.16              | 0.635 | 0.027   | 0.567 |
| 13-42874887-C-CA            | frameshift_variant      | p.Thr670fs   | AKAP11    | chapscz123  | NA                        | 0.979           | 0.313             | NA    | NA      | NA    |
| 11-120343825-G-T            | stop_gained             | p.Glu989*    | ARHGEF12  | chapscz167  | NA                        | 1               | 3.25              | NA    | NA      | NA    |
| 20-3565405-A-AT             | frameshift_variant      | p.Lys1022fs  | ATRN      | chapscz042  | NA                        | 1               | 2.69              | NA    | NA      | NA    |
| 19-6678035-C-T              | splice_acceptor_variant | NA           | C3        | chapscz022  | 5.29E-05                  | 0.904           | 2.75              | NA    | NA      | NA    |
| 12-2717777-A-G              | missense_variant        | p.Ile1153Val | CACNA1C   | chapscz015  | 4.81E-06                  | 1               | 6.47              | 0.601 | 0.042   | 0.729 |
| 1-6172218-C-T               | missense_variant        | p.Ala1708Thr | CHD5      | chapscz068  | 4.81E-06                  | 1               | 5.32              | 0.732 | 0.031   | 0.595 |
| 20-40079664-T-C             | missense_variant        | p.Asp1202Gly | CHD6      | chapscz030  | 2.40E-05                  | 1               | 4                 | 0.671 | 0.093   | 0.711 |
| 14-21866091-T-C             | missense_variant        | p.Met1648Val | CHD8      | chapscz116  | NA                        | 1               | 5.95              | 0.406 | 0.031   | 0.678 |
| 17-80207447-C-CG            | frameshift_variant      | p.Arg306fs   | CSNK1D    | chapscz133  | NA                        | 0.996           | 2.7               | NA    | NA      | NA    |
| 4-151142828-G-A             | splice_acceptor_variant | NA           | DCLK2     | chapscz042  | NA                        | 0.957           | 1.76              | NA    | NA      | NA    |
| 15-65954266-TCTTGA-T        | frameshift_variant      | p.Val1837fs  | DENND4A   | chapscz068  | 1.47E-05                  | 0.996           | 3.67              | NA    | NA      | NA    |
| 12-31586177-C-T             | stop_gained             | p.Trp673*    | DENND5B   | chapscz132  | NA                        | 1               | 3.39              | NA    | NA      | NA    |
| 2-233001277-CCT-C           | frameshift_variant      | p.Leu267fs   | DIS3L2    | chapscz081  | NA                        | 0.944           | 0.944             | NA    | NA      | NA    |
| 8-26501008-C-A              | missense_variant        | p.His289Asn  | DPYSL2    | chapscz126  | 1.45E-05                  | 0.994           | 3.88              | 0.59  | 0.059   | 0.642 |
| 6-56498989-C-CT             | frameshift_variant      | p.Val651fs   | DST       | chapscz050  | NA                        | 1               | 2.22              | NA    | NA      | NA    |
| 7-143053910-G-T             | stop_gained             | p.Tyr244*    | FAM131B   | chapscz144  | NA                        | 0.991           | 1.42              | NA    | NA      | NA    |
| 2-48132707-CT-C             | frameshift_variant      | p.Gln51fs    | FBXO11    | chapscz117  | NA                        | 1               | 4.38              | NA    | NA      | NA    |
| 2-48132709-GCT-G            | frameshift_variant      | p.Gln50fs    | FBXO11    | chapscz117  | NA                        | 1               | 4.38              | NA    | NA      | NA    |
| 19-17883356-A-ATTGGCAGGTGAG | frameshift_variant      | p.Tyr218fs   | FCHO1     | chapscz098  | NA                        | 0.998           | 1.4               | NA    | NA      | NA    |
| 7-114284810-G-T             | stop_gained             | p.Glu354*    | FOXP2     | chapscz107  | NA                        | 1               | 1.9               | NA    | NA      | NA    |



| Variant ID         | Effect                  | HGVS_p       | Gene Name | Sample Name | gnomAD Exome non_neuro_AF | gnomAD Gene pLI | gnomAD Gene mis_z | MTR   | MTR FDR | REVEL |
|--------------------|-------------------------|--------------|-----------|-------------|---------------------------|-----------------|-------------------|-------|---------|-------|
| 4-48529660-GAAAT-G | frameshift_variant      | p.Ser2384fs  | FRYL      | chapscz016  | NA                        | 0.997           | 2.96              | NA    | NA      | NA    |
| 10-35928610-T-C    | missense_variant        | p.Tyr583Cys  | FZD8      | chapscz081  | NA                        | 0.79            | 3.17              | 0.707 | 0.048   | 0.782 |
| 4-46263990-T-C     | missense_variant        | p.Thr338Ala  | GABRA2    | chapscz103  | 4.81E-06                  | 0.996           | 3.13              | 0.559 | 0.061   | 0.8   |
| 9-74865664-A-C     | splice_acceptor_variant | NA           | GDA       | chapscz121  | NA                        | 0.999           | 1.46              | NA    | NA      | NA    |
| 11-88386431-C-T    | missense_variant        | p.Arg351Gln  | GRM5      | chapscz072  | 4.81E-06                  | 0.999           | 3.21              | 0.688 | 0.058   | 0.816 |
| 5-74646765-ATCTC-A | frameshift_variant      | p.Ser313fs   | HMGCR     | chapscz013  | NA                        | 0.999           | 3.76              | NA    | NA      | NA    |
| 13-98664545-G-A    | missense_variant        | p.Glu719Lys  | IPO5      | chapscz012  | 1.44E-05                  | 1               | 3.36              | 0.478 | 0.024   | 0.615 |
| 21-35257811-C-T    | missense_variant        | p.Pro1610Ser | ITSN1     | chapscz082  | NA                        | 1               | 3.61              | 0.483 | 0.004   | 0.507 |
| 20-10625568-C-T    | missense_variant        | p.Gly763Ser  | JAG1      | chapscz022  | 3.36E-05                  | 1               | 3.25              | 0.723 | 0.082   | 0.672 |
| 12-5021197-C-G     | missense_variant        | p.Thr218Arg  | KCNA1     | chapscz084  | 4.80E-06                  | 0.076           | 3.33              | 0.718 | 0.081   | 0.526 |
| 20-48098611-C-T    | missense_variant        | p.Arg136His  | KCNB1     | chapscz099  | NA                        | 1               | 4.27              | 0.568 | 0.053   | 0.823 |
| 2-15555474-G-C     | missense_variant        | p.Glu63Gln   | KCNJ3     | chapscz073  | NA                        | 0.991           | 4.06              | 0.248 | 0.001   | 0.788 |
| 12-21926333-A-G    | missense_variant        | p.Leu73Pro   | KCNJ8     | chapscz028  | NA                        | 0.38            | 3.45              | 0.556 | 0.091   | 0.982 |
| 16-15698201-G-A    | stop_gained             | p.Arg1413*   | KIAA0430  | chapscz011  | NA                        | 1               | 2.73              | NA    | NA      | NA    |
| 11-66031422-A-AG   | frameshift_variant      | p.Ile311fs   | KLC2      | chapscz107  | NA                        | 0.975           | 2.02              | NA    | NA      | NA    |
| 4-18023353-TTCTC-T | frameshift_variant      | p.Arg7fs     | LCORL     | chapscz074  | NA                        | 0.924           | 1.66              | NA    | NA      | NA    |
| 19-49005737-C-G    | missense_variant        | p.Glu278Asp  | LMTK3     | chapscz044  | NA                        | 1               | 4.32              | 0.606 | 0.037   | 0.556 |
| 20-3147741-TG-T    | frameshift_variant      | p.Pro23fs    | LZTS3     | chapscz129  | NA                        | 0.996           | 1.75              | NA    | NA      | NA    |
| 10-121598071-C-CT  | frameshift_variant      | p.Glu464fs   | MCMBP     | chapscz095  | NA                        | 0.996           | 1.98              | NA    | NA      | NA    |
| 1-204515996-T-TAC  | frameshift_variant      | p.Ser300fs   | MDM4      | chapscz020  | NA                        | 1               | 1.71              | NA    | NA      | NA    |
| 6-131917146-G-A    | missense_variant        | p.Pro985Leu  | MED23     | chapscz162  | NA                        | 3.10E-08        | 4.73              | 0.631 | 0.088   | 0.505 |
| 14-105905053-C-T   | missense_variant        | p.Arg25Trp   | MTA1      | chapscz129  | NA                        | 1               | 3.5               | 0.502 | 0.024   | 0.743 |
| 20-62836451-G-C    | splice_donor_variant    | NA           | MYT1      | chapscz036  | 9.62E-06                  | 0.978           | 2.56              | NA    | NA      | NA    |
| 12-124819821-CG-C  | frameshift_variant      | p.Val2081fs  | NCOR2     | chapscz011  | NA                        | 1               | 2.01              | NA    | NA      | NA    |
| 9-102590382-C-T    | stop_gained             | p.Gln31*     | NR4A3     | chapscz047  | NA                        | 0.913           | 2.81              | NA    | NA      | NA    |

| Variant ID            | Effect                  | HGVS_p       | Gene Name | Sample Name | gnomAD Exome non_neuro_AF | gnomAD Gene pLI | gnomAD Gene mis_z | MTR   | MTR FDR | REVEL |
|-----------------------|-------------------------|--------------|-----------|-------------|---------------------------|-----------------|-------------------|-------|---------|-------|
| 9-87570260-C-T        | missense_variant        | p.Ser667Leu  | NTRK2     | chapscz074  | 4.87E-06                  | 1               | 3.73              | 0.61  | 0.065   | 0.634 |
| 1-9787026-T-A         | missense_variant        | p.Phe1019Leu | PIK3CD    | chapscz044  | NA                        | 1               | 4.27              | 0.552 | 0.026   | 0.544 |
| 20-8709793-G-C        | missense_variant        | p.Gln620His  | PLCB1     | chapscz012  | NA                        | 0.983           | 3.83              | 0.414 | 0.06    | 0.592 |
| 11-64025983-C-T       | missense_variant        | p.Arg351Cys  | PLCB3     | chapscz128  | 4.82E-06                  | 0.94            | 3.27              | 0.499 | 0.021   | 0.645 |
| 12-106895135-G-A      | missense_variant        | p.Val1007Met | POLR3B    | chapscz080  | 3.85E-05                  | 1.68E-23        | 3.2               | 0.525 | 0.014   | 0.592 |
| 4-102030139-T-C       | missense_variant        | p.Tyr119Cys  | PPP3CA    | chapscz038  | NA                        | 1               | 3.63              | 0.506 | 0.079   | 0.656 |
| 19-54403863-A-T       | splice_acceptor_variant | NA           | PRKCG     | chapscz130  | NA                        | 1               | 3.06              | NA    | NA      | NA    |
| 10-89653847-A-G       | missense_variant        | p.Asn49Asp   | PTEN      | chapscz133  | NA                        | 0.257           | 3.49              | 0.472 | 0.019   | 0.716 |
| 8-141762340-G-A       | stop_gained             | p.Gln470*    | PTK2      | chapscz046  | NA                        | 1               | 3.44              | NA    | NA      | 0.457 |
| 2-20494234-AC-A       | frameshift_variant      | p.Val352fs   | PUM2      | chapscz113  | NA                        | 0.995           | 2.59              | NA    | NA      | NA    |
| X-73811754-T-TGGAA    | frameshift_variant      | p.Ser466fs   | RLIM      | chapscz042  | NA                        | 0.993           | 2.42              | NA    | NA      | NA    |
| X-73811755-C-CTG      | frameshift_variant      | p.Ser466fs   | RLIM      | chapscz042  | NA                        | 0.993           | 2.42              | NA    | NA      | NA    |
| 22-20783543-C-CG      | frameshift_variant      | p.Leu509fs   | SCARF2    | chapscz098  | 4.81E-06                  | 1               | 3.02              | NA    | NA      | NA    |
| 9-135187206-TTCTC-T   | frameshift_variant      | p.Glu1770fs  | SETX      | chapscz120  | 2.89E-05                  | 0.955           | -0.112            | NA    | NA      | NA    |
| 9-2073297-C-T         | missense_variant        | p.Ala611Val  | SMARCA2   | chapscz122  | NA                        | 1               | 5.05              | 0.288 | 0       | 0.713 |
| 9-2039708-G-A         | missense_variant        | p.Glu200Lys  | SMARCA2   | chapscz046  | 9.68E-06                  | 1               | 5.05              | 0.583 | 0.017   | 0.509 |
| 17-45992756-C-T       | splice_donor_variant    | NA           | SP2       | chapscz059  | 2.42E-05                  | 0.997           | 2.37              | NA    | NA      | NA    |
| 19-46341718-C-T       | splice_donor_variant    | NA           | SYMPK     | chapscz142  | NA                        | 1               | 2.86              | NA    | NA      | NA    |
| 10-114925401-TC-T     | frameshift_variant      | p.Ser490fs   | TCF7L2    | chapscz122  | 3.88E-05                  | 0.995           | 2.4               | NA    | NA      | NA    |
| 6-35446210-C-G        | splice_donor_variant    | NA           | TEAD3     | chapscz065  | NA                        | 0.994           | 2.76              | NA    | NA      | NA    |
| 8-73958260-G-A        | stop_gained             | p.Trp383*    | TERF1     | chapscz052  | NA                        | 0.907           | 0.372             | NA    | NA      | NA    |
| 4-154191485-AG-A      | splice_acceptor_variant | NA           | TRIM2     | chapscz116  | NA                        | 0.996           | 3.57              | NA    | NA      | NA    |
| 7-138946487-AGTAAGT-A | splice_donor_variant    | NA           | UBN2      | chapscz013  | NA                        | 1               | 0.187             | NA    | NA      | NA    |
| 19-35762011-C-T       | stop_gained             | p.Arg232*    | USF2      | chapscz036  | 4.81E-06                  | 0.993           | 1.89              | NA    | NA      | NA    |
| 9-35061044-T-G        | missense_variant        | p.Asn443His  | VCP       | chapscz134  | 4.81E-06                  | 1               | 5.41              | 0.636 | 0.062   | 0.58  |
| 12-14943528-G-A       | stop_gained             | p.Gln391*    | WBP11     | chapscz075  | NA                        | 1               | 2.98              | NA    | NA      | NA    |

| Variant ID                   | Effect             | HGVS_p      | Gene Name | Sample Name | gnomAD Exome non_neuro_AF | gnomAD Gene pLI | gnomAD Gene mis_z | MTR   | MTR FDR | REVEL |
|------------------------------|--------------------|-------------|-----------|-------------|---------------------------|-----------------|-------------------|-------|---------|-------|
| 9-137019605-G-A              | missense_variant   | p.Val217Met | WDR5      | chapszcz151 | NA                        | 1               | 3.39              | 0.242 | 0       | 0.715 |
| 14-23994453-TTCAGGGGCACGGG-T | frameshift_variant | p.Thr1562fs | ZFX2      | chapszcz044 | 0                         | 0.997           | 2.95              | NA    | NA      | NA    |

## References

1. G. B. D. Disease, I. Injury, C. Prevalence, Global, regional, and national incidence, prevalence, and years lived with disability for 310 diseases and injuries, 1990-2015: a systematic analysis for the Global Burden of Disease Study 2015. *Lancet* **388**, 1545-1602 (2016).
2. P. F. Sullivan, K. S. Kendler, M. C. Neale, Schizophrenia as a complex trait: evidence from a meta-analysis of twin studies. *Arch. Gen. Psychiatry* **60**, 1187-1192 (2003).
3. A. Sekar *et al.*, Schizophrenia risk from complex variation of complement component 4. *Nature* **530**, 177-183 (2016).
4. C. Schizophrenia Working Group of the Psychiatric Genomics, Biological insights from 108 schizophrenia-associated genetic loci. *Nature* **511**, 421-427 (2014).
5. T. Singh *et al.*, Exome sequencing identifies rare coding variants in 10 genes which confer substantial risk for schizophrenia. *medRxiv* 10.1101/2020.09.18.20192815, 2020.2009.2018.20192815 (2020).
6. J. Kaplanis *et al.*, Evidence for 28 genetic disorders discovered by combining healthcare and research data. *Nature* 10.1038/s41586-020-2832-5 (2020).
7. F. K. Satterstrom *et al.*, Large-Scale Exome Sequencing Study Implicates Both Developmental and Functional Changes in the Neurobiology of Autism. *Cell* **180**, 568-584 e523 (2020).
8. K. Ahn *et al.*, High rate of disease-related copy number variations in childhood onset schizophrenia. *Mol. Psychiatry* **19**, 568-572 (2014).
9. K. C. Epi *et al.*, De novo mutations in epileptic encephalopathies. *Nature* **501**, 217-221 (2013).
10. I. K. Kotowski *et al.*, A spectrum of PCSK9 alleles contributes to plasma levels of low-density lipoprotein cholesterol. *Am. J. Hum. Genet.* **78**, 410-422 (2006).
11. T. N. Turner *et al.*, Loss of delta-catenin function in severe autism. *Nature* **520**, 51-56 (2015).
12. I. J. Barnett, S. Lee, X. Lin, Detecting rare variant effects using extreme phenotype sampling in sequencing association studies. *Genet. Epidemiol.* **37**, 142-151 (2013).
13. A. Ambalavanan *et al.*, De novo variants in sporadic cases of childhood onset schizophrenia. *Eur. J. Hum. Genet.* **24**, 944-948 (2016).
14. E. J. Gardner *et al.*, Sex-biased reduction in reproductive success drives selective constraint on human genes. *bioRxiv* (2020).
15. S. Gulsuner *et al.*, Genetics of schizophrenia in the South African Xhosa. *Science* **367**, 569-573 (2020).
16. E. F. Torrey (2016) Going, Going Gone: Trends and Consequences of Eliminating State Psychiatric Beds. (Treatment Advocacy Center, Arlington, Virginia), pp 1-38.
17. T. Singh *et al.*, The contribution of rare variants to risk of schizophrenia in individuals with and without intellectual disability. *Nat. Genet.* **49**, 1167-1173 (2017).
18. American Psychiatric Association., *Diagnostic and statistical manual of mental disorders : DSM-5* (American Psychiatric Association, Washington, D.C., ed. 5th, 2013), pp. xlv, 947 p.
19. E. Collaborative, Sub-genic intolerance, ClinVar, and the epilepsies: A whole-exome sequencing study of 29,165 individuals. *Am. J. Hum. Genet.* **108**, 965-982 (2021).
20. F. K. Satterstrom *et al.*, Autism spectrum disorder and attention deficit hyperactivity disorder have a similar burden of rare protein-truncating variants. *Nat. Neurosci.* **22**, 1961-1965 (2019).
21. K. J. Karczewski *et al.*, The mutational constraint spectrum quantified from variation in 141,456 humans. *Nature* **581**, 434-443 (2020).
22. M. Halvorsen *et al.*, Exome sequencing in obsessive-compulsive disorder reveals a burden of rare damaging coding variants. *Nat. Neurosci.* **24**, 1071-1076 (2021).
23. N. M. Ioannidis *et al.*, REVEL: An Ensemble Method for Predicting the Pathogenicity of Rare Missense Variants. *Am. J. Hum. Genet.* **99**, 877-885 (2016).
24. R. Ghosh, N. Oak, S. E. Plon, Evaluation of in silico algorithms for use with ACMG/AMP clinical variant interpretation guidelines. *Genome Biol.* **18**, 225 (2017).

25. M. Silk, S. Petrovski, D. B. Ascher, MTR-Viewer: identifying regions within genes under purifying selection. *Nucleic Acids Res.* **47**, W121-W126 (2019).
26. B. B. Cummings *et al.*, Transcript expression-aware annotation improves rare variant interpretation. *Nature* **581**, 452-458 (2020).
27. S. Benjamin, M. D. Lauterbach, A. L. Stanislawski, Congenital and acquired disorders presenting as psychosis in children and young adults. *Child Adolesc. Psychiatr. Clin. N. Am.* **22**, 581-608 (2013).
28. M. D. Lauterbach, A. L. Stanislawski-Zygaj, S. Benjamin, The differential diagnosis of childhood- and young adult-onset disorders that include psychosis. *J. Neuropsychiatry Clin. Neurosci.* **20**, 409-418 (2008).
29. Online Mendelian Inheritance in Man, OMIM® (2020) (McKusick-Nathans Institute of Genetic Medicine, Johns Hopkins University (Baltimore, MD)).
30. S. Richards *et al.*, Standards and guidelines for the interpretation of sequence variants: a joint consensus recommendation of the American College of Medical Genetics and Genomics and the Association for Molecular Pathology. *Genet. Med.* **17**, 405-424 (2015).
31. K. D. MacDermot *et al.*, Identification of FOXP2 truncation as a novel cause of developmental speech and language deficits. *Am. J. Hum. Genet.* **76**, 1074-1080 (2005).
32. E. Martin *et al.*, Heterozygous loss of WBP11 function causes multiple congenital defects in humans and mice. *Hum. Mol. Genet.* **29**, 3662-3678 (2020).
33. T. Balakrishna, D. Curtis, Assessment of Potential Clinical Role for Exome Sequencing in Schizophrenia. *Schizophr. Bull.* 10.1093/schbul/sbz057 (2019).
34. S. Srivastava *et al.*, Meta-analysis and multidisciplinary consensus statement: exome sequencing is a first-tier clinical diagnostic test for individuals with neurodevelopmental disorders. *Genet. Med.* **21**, 2413-2421 (2019).
35. D. Astuti *et al.*, Germline mutations in DIS3L2 cause the Perlman syndrome of overgrowth and Wilms tumor susceptibility. *Nat. Genet.* **44**, 277-284 (2012).
36. V. Sriretnakumar, R. Harripaul, J. B. Vincent, J. L. Kennedy, J. So, Enrichment of pathogenic variants in genes associated with inborn errors of metabolism in psychiatric populations. *Am. J. Med. Genet. B Neuropsychiatr. Genet.* **180**, 46-54 (2019).
37. L. Bastarache *et al.*, Phenotype risk scores identify patients with unrecognized Mendelian disease patterns. *Science* **359**, 1233-1239 (2018).
38. G. Genovese *et al.*, Increased burden of ultra-rare protein-altering variants among 4,877 individuals with schizophrenia. *Nat. Neurosci.* **19**, 1433-1441 (2016).
39. F. Lescai *et al.*, Meta-analysis of Scandinavian Schizophrenia Exomes. *bioRxiv* (2019).
40. S. Perry, B. Kiragasi, D. Dickman, A. Ray, The Role of Histone Deacetylase 6 in Synaptic Plasticity and Memory. *Cell Rep* **18**, 1337-1345 (2017).
41. H. F. Chan *et al.*, A novel neuropsychiatric phenotype of KCNJ2 mutation in one Taiwanese family with Andersen-Tawil syndrome. *J. Hum. Genet.* **55**, 186-188 (2010).
42. W. S. Stone *et al.*, Association Between the Duration of Untreated Psychosis and Selective Cognitive Performance in Community-Dwelling Individuals With Chronic Untreated Schizophrenia in Rural China. *JAMA Psychiatry* 10.1001/jamapsychiatry.2020.1619 (2020).
43. E. B. Robinson *et al.*, Autism spectrum disorder severity reflects the average contribution of de novo and familial influences. *Proc. Natl. Acad. Sci. U. S. A.* **111**, 15161-15165 (2014).
44. A. Reichenberg *et al.*, Discontinuity in the genetic and environmental causes of the intellectual disability spectrum. *Proc. Natl. Acad. Sci. U. S. A.* **113**, 1098-1103 (2016).
45. H. Guo *et al.*, Genome sequencing identifies multiple deleterious variants in autism patients with more severe phenotypes. *Genet. Med.* **21**, 1611-1620 (2019).
46. S. M. Myers *et al.*, Insufficient Evidence for "Autism-Specific" Genes. *Am. J. Hum. Genet.* **106**, 587-595 (2020).
47. S. L. Bishop *et al.*, Identification of Developmental and Behavioral Markers Associated With Genetic Abnormalities in Autism Spectrum Disorder. *Am. J. Psychiatry* **174**, 576-585 (2017).

48. J. Kane, G. Honigfeld, J. Singer, H. Meltzer, Clozapine for the treatment-resistant schizophrenic. A double-blind comparison with chlorpromazine. *Arch. Gen. Psychiatry* **45**, 789-796 (1988).
49. G. Abraham, Y. Qiu, M. Inouye, FlashPCA2: principal component analysis of Biobank-scale genotype datasets. *Bioinformatics* **33**, 2776-2778 (2017).
50. S. Cameron-Christie *et al.*, Exome-Based Rare-Variant Analyses in CKD. *J. Am. Soc. Nephrol.* **30**, 1109-1122 (2019).
51. S. Petrovski *et al.*, An Exome Sequencing Study to Assess the Role of Rare Genetic Variation in Pulmonary Fibrosis. *Am. J. Respir. Crit. Care Med.* **196**, 82-93 (2017).
52. G. Povysil *et al.*, Rare-variant collapsing analyses for complex traits: guidelines and applications. *Nat Rev Genet* **20**, 747-759 (2019).
53. M. T. Pato *et al.*, The genomic psychiatry cohort: partners in discovery. *Am. J. Med. Genet. B Neuropsychiatr. Genet.* **162B**, 306-312 (2013).
54. A. C. Need *et al.*, Exome sequencing followed by large-scale genotyping suggests a limited role for moderately rare risk factors of strong effect in schizophrenia. *Am. J. Hum. Genet.* **91**, 303-312 (2012).
55. W. J. B. W. First M.B., Karg R.S., Spitzer R.L., *Structured Clinical Interview for DSM-5—Research Version (SCID-5 for DSM-5, Research Version; SCID-5-RV)* (American Psychiatric Association, Arlington, VA, 2015).
56. R. S. Keefe *et al.*, Clinical characteristics of Kraepelinian schizophrenia: replication and extension of previous findings. *Am. J. Psychiatry* **153**, 806-811 (1996).
57. S. A. Mitelman, M. S. Buchsbaum, Very poor outcome schizophrenia: clinical and neuroimaging aspects. *Int. Rev. Psychiatry* **19**, 345-357 (2007).
58. A. G. Cardno, M. J. Owen, Genetic relationships between schizophrenia, bipolar disorder, and schizoaffective disorder. *Schizophr. Bull.* **40**, 504-515 (2014).
59. H. Santelmann, J. Franklin, J. Busshoff, C. Baethge, Interrater reliability of schizoaffective disorder compared with schizophrenia, bipolar disorder, and unipolar depression - A systematic review and meta-analysis. *Schizophr. Res.* **176**, 357-363 (2016).
60. M. First, Spitzer, RL, Gibbon, M, Williams, JBW, *Structured Clinical Interview for DSM-IV-TR Axis I Disorders, Research Version, Patient Edition. (SCID-I/P)*. New York: Biometrics Research, New York State Psychiatric Institute. (2002).
61. N. A. Miller *et al.*, A 26-hour system of highly sensitive whole genome sequencing for emergency management of genetic diseases. *Genome Med.* **7**, 100 (2015).
62. G. A. Van der Auwera *et al.*, From FastQ data to high confidence variant calls: the Genome Analysis Toolkit best practices pipeline. *Curr Protoc Bioinformatics* **43**, 11 10 11-33 (2013).
63. P. Cingolani *et al.*, A program for annotating and predicting the effects of single nucleotide polymorphisms, SnpEff: SNPs in the genome of *Drosophila melanogaster* strain w1118; iso-2; iso-3. *Fly (Austin)* **6**, 80-92 (2012).
64. Z. Ren *et al.*, ATAV: a comprehensive platform for population-scale genomic analyses. *BMC Bioinformatics* **22**, 149 (2021).
65. P. D. Stenson *et al.*, Human Gene Mutation Database (HGMD): 2003 update. *Hum. Mutat.* **21**, 577-581 (2003).
66. M. J. Landrum *et al.*, ClinVar: public archive of relationships among sequence variation and human phenotype. *Nucleic Acids Res.* **42**, D980-985 (2014).
67. G. Jun *et al.*, Detecting and estimating contamination of human DNA samples in sequencing and array-based genotype data. *Am. J. Hum. Genet.* **91**, 839-848 (2012).
68. A. Manichaikul *et al.*, Robust relationship inference in genome-wide association studies. *Bioinformatics* **26**, 2867-2873 (2010).
69. M. Lek *et al.*, Analysis of protein-coding genetic variation in 60,706 humans. *Nature* **536**, 285-291 (2016).
70. B. B. Cummings *et al.*, Transcript expression-aware annotation improves rare variant discovery and interpretation. *bioRxiv* (2019).

71. H. L. Rehm *et al.*, ClinGen--the Clinical Genome Resource. *N. Engl. J. Med.* **372**, 2235-2242 (2015).
